1 P2X antagonists inhibit HIV-1 productive infection and inflammatory cytokines IL-10 and IL-1 $\beta$  in a human  
2 tonsil explant model

3  
4 Alexandra Y. Soare<sup>a</sup>, Natasha D. Durham<sup>a,b</sup>, Ramya Gopal<sup>c</sup>, Benjamin Tweel<sup>d</sup>, Kevin W. Hoffman<sup>e</sup>, Julia A.  
5 Brown<sup>e</sup>, Megan O'Brien<sup>a,c</sup>, Nina Bhardwaj<sup>c</sup>, Jean K. Lim<sup>e</sup>, and Benjamin K. Chen<sup>a</sup>, and Talia H. Swartz<sup>a#</sup>

6  
7 Author Affiliations:

8 <sup>a</sup> Division of Infectious Diseases, Department of Medicine, Immunology Institute, Icahn School of  
9 Medicine at Mount Sinai, New York, New York, USA

10 <sup>b</sup> Division of Molecular Biology & Microbiology, Sackler School of Graduate Biomedical Sciences, Tufts  
11 University School of Medicine, Boston, Massachusetts, USA

12 <sup>c</sup> Division of Hematology and Oncology, Tisch Cancer Institute, Icahn School of Medicine at Mount  
13 Sinai, New York, New York, USA

14 <sup>d</sup> Department of Otolaryngology, Icahn School of Medicine at Mount Sinai, New York, New York, USA

15 <sup>e</sup> Department of Microbiology, Icahn School of Medicine at Mount Sinai, New York, New York, USA

16  
17 Running Title: P2X antagonists block HIV-1 infection and inflammation

18  
19 # Corresponding author:

20 Talia H. Swartz, M.D., Ph.D.

21 Assistant Professor

22 Department of Medicine

23 Division of Infectious Disease

24 Immunology Institute

25 One Gustave L. Levy Place

26 Box 1090

27 Mount Sinai School of Medicine

28 New York, NY 10029

29 212-241-6078

30 [talia.swartz@mssm.edu](mailto:talia.swartz@mssm.edu)

31

32

33 The authors have declared that no conflict of interest exists.

34

35 Abstract word count: 315

36 Text word count: 5,482

37 **Abstract**

38  
39 HIV-1 causes a persistent infection of the immune system that is associated with chronic comorbidities.  
40 The mechanisms that underlie this inflammation are poorly understood. Emerging literature has implicated pro-  
41 inflammatory purinergic receptors and downstream signaling mediators in HIV-1 infection. This study probed  
42 whether inhibitors of purinergic receptors would reduce HIV-1 infection and HIV-1 stimulated inflammation. A  
43 human *ex vivo* human tonsil histo-culture infection model was developed to support HIV-1 productive infection  
44 and stimulated inflammatory cytokine interleukin-1 beta (IL-1 $\beta$ ) and immunosuppressive cytokine, interleukin-  
45 10 (IL-10). This study tests whether inhibitors of purinergic receptors would reduce HIV-1 infection and HIV-1  
46 stimulated inflammation. The purinergic P2X1 receptor antagonist, NF449, the purinergic P2X7 receptor  
47 antagonists, A438079, and azidothymidine (AZT) were tested in HIV-1 infected human tonsil explants to  
48 compare inhibition of HIV-1 infection and HIV-stimulated inflammatory cytokine production. All drugs limited  
49 HIV-1 productive infection but P2X-selective antagonists (NF449, and A438079) significantly lowered HIV-  
50 stimulated IL-10 and IL-1 $\beta$ . We further observed that P2X1- and P2X7-selective antagonists can act  
51 differentially as inhibitors of both HIV-1 infection and HIV-1-stimulated inflammation. Our findings highlight the  
52 differential effects of HIV-1 on inflammation in peripheral blood as compared to lymphoid tissue. For the first  
53 time, we demonstrate that P2X-selective antagonists act differentially as inhibitors of both HIV-1 infection and  
54 HIV-1-stimulated inflammation. Drugs that block these pathways can have independent inhibitory activities  
55 against HIV-1 infection and HIV-induced inflammation.

56  
57 **IMPORTANCE:**

58 Patients who are chronically infected with HIV-1 experience sequelae related to chronic inflammation. The  
59 mechanisms of this inflammation have not been elucidated. Here we describe a class of drugs that target the  
60 P2X pro-inflammatory signaling receptors in a human tonsil explant model. This model highlights differences in  
61 HIV-1 stimulation of lymphoid tissue inflammation and peripheral blood. These drugs serve to both block HIV-1  
62 infection and production of IL-10 and IL-1 $\beta$  in lymphoid tissue suggesting a novel approach to HIV-1  
63 therapeutics in which both HIV-1 replication and inflammatory signaling are simultaneously targeted.

## 65 Introduction

66  
67 HIV-1 infection remains a major global health concern, despite the development of effective antiviral  
68 therapies to control the virus. An estimated 36.7 million people live with HIV-1, with 1.1 million people infected  
69 in the United States (1). Individuals on antiretroviral therapy (ART) can live long and healthy lives with  
70 suppressed viremia; however, infected individuals experience chronic inflammation associated with co-  
71 morbidities and increased risk of mortality (2-5). Despite undetectable viremia levels, long-term treated HIV-1  
72 patients experience significantly higher rates of age-associated non-communicable co-morbidities (AANCCs),  
73 such as cardiovascular disease, frailty, and cognitive decline (6). The accelerated aging phenomenon has  
74 introduced new considerations in the care of HIV-1 infected patients (7-9).

75  
76 The mechanisms underlying this chronic inflammation in HIV-1 infection are multifactorial. Depletion of  
77 CD4<sup>+</sup> T cells at mucosal surfaces during HIV-1 infection can lead to reduced integrity of the mucosal epithelium  
78 and increased bacterial translocation (10). The subsequent elevated levels of plasma bacterial cell wall  
79 lipopolysaccharide (LPS) are associated with inflammatory biomarkers in HIV-1 patients, such as chronic  
80 monocyte activation, increased soluble CD14 (sCD14), and production of pro-inflammatory cytokines (11).  
81 Low-level viremia continues to stimulate systemic inflammation (12, 13). Despite numerous lines of evidence,  
82 no unifying mechanism has defined a connection between factors mediating early HIV-1 infection and cellular  
83 mechanisms of innate immune signaling.

84  
85 Emerging literature has implicated the pro-inflammatory purinergic receptors in HIV-1 pathogenesis (19-  
86 35). Purinergic receptors mediate inflammation in many disease states (14-19) in response to extracellular  
87 nucleotides that are released from inflamed or dying cells (20, 21). P2X receptor subtypes are nonselective  
88 cation channels that can be found on a wide variety of tissue types, notably lymphocytes,  
89 monocyte/macrophages, and dendritic cells (DCs) (22-25). They are critical mediators of the innate immune  
90 response in a variety of different disease states including rheumatoid arthritis, transplant rejection, and  
91 inflammatory bowel disease (26-29). The P2X7 subtype is most highly expressed in immune cells (25, 30).

92 P2X7 receptors, in concert with Toll-like receptors (TLRs), activate the NLRP3 (NACHT, LRR and PYD  
93 domains containing protein 3) inflammasome complex. The NLRP3 inflammasome is a highly conserved innate  
94 immune mechanism responsible for responding to pathogens by signaling cells to undergo pro-inflammatory  
95 cytokine production. This signaling mediates caspase-1-dependent release of IL-1 $\beta$  (23, 30), which can be  
96 secreted to promote inflammation or can stimulate pro-inflammatory lymphocyte programmed cell death known  
97 as pyroptosis which has been proposed to be an important cause of CD4<sup>+</sup> T cell depletion (31, 32).

98  
99 P2X1 and P2X7 subtypes are predominantly expressed on CD4<sup>+</sup> T cells, the primary target of HIV-1  
100 infection (42, 43). Recent studies by our group and others demonstrate that non-selective P2 antagonists  
101 blocking HIV-1 infection (33, 34). Non-selective P2X antagonists can reduce neurotoxic effects in murine  
102 neuron-microglial co-cultures exposed to HIV-1 transactivator of transcription (Tat) (35). These inhibitors can  
103 block HIV-1 infection in a dose-dependent manner during cell-to-cell and cell-free HIV-1 infection (34).  
104 Selective inhibitors of P2X receptors reduced HIV-1 replication in macrophages (36). Graziano *et al.*  
105 corroborated the importance of P2X7 in HIV-1 infection of macrophages by showing P2X7 inhibition blocked  
106 release of HIV-1 virions (37). Expression of P2X7 on human astrocytes is increased in the presence of HIV-1  
107 Tat and P2X7 inhibitors have been demonstrated to reduce HIV-1 induced neuronal and microglial damage  
108 (38-40). Recently, Menkova-Garnier *et al.* demonstrated that P2X7 inhibitors restore T-cell differentiation in  
109 CD34<sup>+</sup> cells derived from HIV-infected immunological non-responders (41). Additionally, P2X1 selective  
110 inhibitors were shown to inhibit HIV-1 fusion by blocking virus interactions with co-receptors C-C chemokine-  
111 receptor 5 (CCR5) and CXC chemokine-receptor 4 (CXCR4) (33, 42). As P2X receptors are also known  
112 mediators of inflammation and inflammatory signaling, it was of interest to understand whether HIV-1  
113 stimulated inflammatory cytokine production would be abrogated by P2X inhibition.

114  
115 Here, we examined the role of P2X-selective antagonists on HIV-1 productive infection and investigated  
116 whether these inhibitors block inflammatory cytokine production in response to HIV-1 stimulation. We  
117 demonstrate through an *ex vivo* tonsil model that these drugs can reduce HIV-1 stimulated IL-10 and IL-1 $\beta$   
118 production, suggesting an important role for P2X inhibition in HIV-1 infection and HIV-stimulated inflammatory  
119 cytokine production.

120

## 121 **Results**

122

### 123 **P2X inhibitors NF449 and A38079 can reduce HIV-1 productive infection in peripheral blood** 124 **mononuclear cells (PBMCs).**

125

126 Prior studies have reported that antagonists of proinflammatory purinergic receptor that detect  
127 extracellular ATP, here referred to as P2X inhibitors, can inhibit productive HIV-1 infection in T cell lines (33,  
128 34, 43). We tested the role of a P2X1 inhibitor, NF449, and a P2X7 inhibitor, A438079, in blocking HIV-1  
129 productive infection in PBMCs. Activated PBMCs were infected with HIV-1 NL-CI, a X4-tropic virus with an  
130 mCherry reporter, as previously described (44, 45), in the presence of NF449 and A438079. Reverse  
131 transcriptase azidothymidine (AZT) was tested as a positive control (Figure 1A). NF449 significantly reduced  
132 HIV-1 infection in PBMCs down to 25% while A438079 was less effective and reduced HIV-1 infection down to  
133 60%. AZT inhibited infection by nearly 90%. None of the drugs tested exhibited toxicity on PBMCs (Figure 1B).

134

135 Next, we tested the ability of these P2X-selective inhibitors to block HIV-1 stimulated inflammatory  
136 cytokine production. PBMCs were isolated and exposed to HIV-1<sub>MN</sub> and tested for stimulation of inflammatory  
137 cytokines by cytokine bead array. Our initial findings indicated that minimal cytokine elevation was observed  
138 with HIV-1 infection of PBMCs (Figure 1C, 1D). As stated before, it is known that inflammasome activation  
139 requires two signals; the first is a TLR agonist and the second is a P2X agonist that we propose is stimulated  
140 by HIV-1 infection (46, 47). Therefore, we tested the effect of addition of a physiological level of LPS (1 pg/ml),  
141 a TLR4 agonist that has been reported to be circulating in the blood of HIV-infected individuals (10, 48, 49).  
142 Addition of LPS resulted in stimulation of IL-10 (Figure 1C) and IL-1 $\beta$  (Figure 1D) levels, but with only a small  
143 and not significant increase in HIV-1-dependent IL-10 production. We then pursued the establishment of a  
144 system more physiologically relevant to understand the interaction of HIV-1 infection and stimulation of  
145 inflammatory cytokine production.

146

### 147 **An *ex vivo* human lymphoid aggregate culture (HLACs) supports HIV-1 productive infection.**

148

149 *Ex vivo* infection of human lymphoid aggregate cultures (HLACs) with HIV-1 is a well-studied model  
150 system where HIV-1 induced-inflammasome activation has been characterized (50-55) and is an appropriate  
151 system to study inflammatory signaling that results from HIV-1 infection. Unlike blood-derived CD4-T cells,  
152 lymphoid-derived cells are not naturally resistant to pyroptosis in culture and do not require activation or  
153 addition of exogenous TLR agonists for HIV-1 infection (51). Human tonsil explants were obtained from healthy  
154 tonsillectomy patients, homogenized as previously described (56) and cultivated in HLACs. HLACs were  
155 infected with HIV-1 NL-CI and harvested on 0, 2, 5, 8, and 12 days post infection (DPI) (Figure 2A). Infection  
156 was quantified by flow cytometric detection of mCherry-positive viable cells as indicative of HIV-1 NL-CI  
157 infection (Figure 2B). Peak infection was noted on Day 8 with a decline by day 12. Infection was statistically  
158 significant on days 2-12. Viability of these cells was quantified by flow cytometric detection of live cells (Figure  
159 2C). Viability in the infected condition falls to below 20% by 12 DPI. On 8 DPI, there is a statistically significant  
160 difference between viability of infected cells and uninfected cells that corresponds to the timing of peak  
161 infection. Figure 2D demonstrates representative flow cytometry plots of viability of cells over the course of  
162 infection indicating waning viability over the course of infection. Figure 2E demonstrates representative flow  
163 cytometry plots of the infection of subset of live cells on 0, 2, 5, 8, and 12 DPI.

164

### 165 **NF449 and A438079 reduce HIV-1 productive infection in HLACs.**

166

167 Using this tonsil system that can support HIV-1 infection, we tested whether two P2X antagonists,  
168 NF449 (a P2X1>>P2X7 inhibitor) and A438079 (a P2X7 inhibitor) would reduce HIV-1 productive infection in  
169 comparison to AZT. HLACs were prepared as in Figure 2 and cells were harvested on 0, 2, 5, 8, and 12 DPI.  
170 Viability of these cells was quantified by flow cytometric detection of live cells (Figure 3A). As in Figure 2B,  
171 viability of cells declined over the infection course by 12 DPI. Interestingly, NF449 and AZT resulted in  
172 statistically significant increase cell survival that was most pronounced between 5-12 DPI. Figure 3B indicates  
173 infection as measured by quantification of cells with mCherry signal, as indicative of HIV-1 NL-CI productive  
174 infection. Both NF449 and A438079 at 100  $\mu$ M reduce HIV-1 productive infection at all time points from 2-12  
175 DPI comparable to inhibition seen by AZT. Surprisingly, A438079 (100  $\mu$ M) effectively inhibited productive HIV-

176 1 infection in human tonsil cells on 8 and 12 DPI, although it incompletely inhibited productive infection of  
177 PBMCs (Figure 1A). Titration of these three drugs was performed at during peak infection at 8 DPI (Figure 3C),  
178 indicating dose-dependent inhibition of HIV-1 productive infection with NF449, A438079, and AZT with IC<sub>50</sub>  
179 values of 12.4 μM, 36.3 μM, and 12.0 μM, respectively.

### 181 **HIV-1 infection is inhibited by NF449 and A438079 in human tonsil explant tissue blocks.**

182  
183 We next tested the supernatants of human tonsil explant tissue blocks to determine how infection levels  
184 are associated with secreted cytokines. To do this, tonsils were dissected and cut into small blocks and  
185 suspended at the liquid-air interface on collagen rafts. Supernatants were collected on days 2, 5, 8, and 12 DPI  
186 (Figure 4A) and saved for experimental analysis. Media with drug were changed completely on each indicated  
187 DPI, and therefore quantification represents cumulative accumulation of viral production. While HLACs allow  
188 for more cellular analysis of viability and infection via flow cytometry, the human tonsil explant tissue block  
189 model allows for preservation of the tonsil tissue cytoarchitecture. Given prior evidence that a lymphoid tissue  
190 microenvironment is required to support the course of HIV-1 infection and pyroptosis (50, 53, 55), we pursued  
191 the development of a tonsil model that could recapitulate the observations of HIV-1 infection and stimulation of  
192 inflammatory cytokine production.

193 First, we attempted to determine if HIV-1 infection and inhibition in the human tonsil explant tissue block  
194 model was comparative to the HLAC model. The HIV-1 NL-CI virus expresses an mCherry gene cloned into  
195 the *nef* position and provides an indicator of early viral gene expression. Nef expression is restored with the  
196 insertion of an internal ribosome entry site. Therefore, infection was monitored by measurement of viral antigen  
197 by HIV-1 p24 ELISA (Figure 4B) and by measuring infectivity in the supernatants by exposure to the HIV-1  
198 indicator TZM-bl cell line and quantification of relative luminescence units (RLUs) (Figure 4C). HIV-1 infection  
199 resulted in significant p24 antigen accumulation from 2-12 DPI accompanied by infectivity of the TZM-bl cell  
200 lines.

201 We next tested the effect of these drugs on reducing HIV-1 p24 antigen accumulation in the *ex vivo*  
202 tonsil tissue model over the 12-day infection (Figure 4D). A significant reduction of HIV-1 p24 antigen  
203 accumulation was observed with NF449 (100 μM) treatment on 8 and 12 DPI. As in the HLAC system in Figure



3, A438079 (100  $\mu$ M) inhibited HIV-1 p24 antigen accumulation on 8 and 12 DPI. In histoculture, A438079 inhibited HIV-1 productive infection to a similar extent as the positive control, AZT (100  $\mu$ M) that fully blocked productive infection.

### **HIV-1 infection is associated with inflammatory cytokine production in *ex vivo* lymphoid model**

With confirmation of the establishment of productive infection by HIV-1 in this *ex vivo* lymphoid model, we next examined if HIV-1 infection stimulated inflammatory cytokine production. Supernatants were harvested from uninfected and infected human tonsil explant tissue blocks and were analyzed for cytokines IL-10, IL-1 $\beta$ , tumor necrosis factor (TNF), interleukin-12p70 (IL-12p70), interleukin-8 (IL-8), and interleukin-6 (IL-6). Supernatants were harvested over the 12-day infection time course and subject to the multiplex bead immunoassay Cytometric Bead Array (CBA; BD Biosciences) (Figure 5A). Cumulative measurements indicated that HIV-1 infection stimulated a significant increase in IL-10 and IL-1 $\beta$  from 2 to 12 DPI. HIV-1 infection stimulated a modest but not significant increase of TNF at 12 DPI and did not stimulate an increase in IL-12p70, IL-8, or IL-6.

We further sought to test whether the stimulation of these cytokines was associated with the magnitude of infection. Figure 5B demonstrates IL-10 and IL-1 $\beta$  production plotted as a function of TZM-bl infectivity. IL-10 and IL-1 $\beta$  production are both positively correlated with HIV-1 infection with  $R^2$  values of 0.45 and 0.49, respectively. This suggests that this model can support the stimulation of inflammatory cytokine production that is directly proportional to the level of HIV-1 infection. For the cytokines for which no significant difference was noted in Figure 5A, notably TNF, IL-12, IL-6, and IL-8, no correlation was observed (data not shown).

### **NF449 and A438079 reduce HIV-1 stimulated IL-10 and IL-1 $\beta$ production in human tonsil cells.**

With the establishment of a tonsil system that supported HIV-1 infection and HIV-1 associated inflammatory cytokine secretion, we examined the role of purinergic signaling pathways in the induction of cytokines by HIV-1 infection. Based on our prior observations that P2X antagonists reduced HIV-1 infection

and fusion (34, 57), it was of interest to test a panel of selective P2X antagonists to identify drugs with inhibition of HIV-1 infectivity in lymphocyte cell lines that would also interfere with HIV-1 stimulation of cytokines in the tonsil system. We tested whether NF449 and A438079 would reduce HIV-1-stimulated inflammatory cytokine production. Human tonsil explant tissue blocks were infected with HIV-1 NL-CI as in Figure 4. Supernatants from infected human tonsil explant tissue blocks were harvested on 2, 5, 8, and 12 DPI and analyzed for inflammatory cytokines by CBA (BD Biosciences). Cumulative IL-10 and IL-1 $\beta$  production over the 12-day infection course was measured in the presence or absence of indicated antagonists. HIV-1 infection stimulated IL-10 production, which was significantly reduced by NF449 and A438079 on 5, 8, and 12 DPI (Figure 6A). Additionally, HIV-1 infection stimulated IL-1 $\beta$  production, which was significantly reduced by A438079 at 5, 8, and 12 DPI (Figure 6B). NF449 did not significantly reduce IL-1 $\beta$  production until 12 DPI. AZT was not expected to inhibit either cytokine production, but did inhibit IL-10 production to a lesser extent than NF449 or A438079. AZT did not reduce IL-1 $\beta$  levels. These observations support the notion that P2X-selective antagonists act on HIV-associated inflammation differently than conventional ART. Overall, we conclude that NF449 and A438079 inhibit HIV-1 replication and IL-10 and IL-1 $\beta$  release in human tonsil explants. This suggests that P2X-selective antagonists are active in both reducing HIV-1 infection and associated inflammation.

## Discussion

Here we demonstrate a human *ex vivo* tonsil model that can support HIV-1 infection over a 12-day incubation. This model represents an important experimental system to test the signaling that mediates HIV-1 infection and HIV-1-stimulated inflammation and illustrates an important distinction between HIV-1 inflammation in peripheral blood and in lymphoid tissues. As soluble cytokine production is challenging to measure in PBMCs, it has been necessary for investigators to probe lymphoid tissues for evidence of HIV-1-stimulated immune activation and pyroptosis which cannot be demonstrated in peripheral blood (50-55). We demonstrate HIV-1 productive infection of human tonsils in HLACs and in human tonsil explant tissue blocks. The advantage to the HLAC system is that cell viability can be measured alongside productive infection using a fluorescent reporter virus. The human tonsil explant tissue blocks allow for measurement of soluble cytokine

260 and the measurement of p24 antigen as an indirect measure of HIV-1 spreading infection. Using these two  
261 models, we demonstrated HIV-1 replication and HIV-1 stimulated IL-10 and IL-1 $\beta$  production.

262  
263 In the HLAC model, we demonstrated HIV-1 productive infection occurred with a peak at 8 DPI and a  
264 corresponding decline in cell viability. All three drugs tested, NF449, A438079, and AZT reduced HIV-1  
265 productive infection, while NF449 and AZT resulted in statistically significant increased cell survival, most  
266 notably on 8-12 DPI, which likely relates to inhibition of HIV-1 productive infection. Dose dependence inhibition  
267 of HIV-1 productive infection was noted for all three drugs with IC<sub>50</sub> values all in the 10-100  $\mu$ M range.

268  
269 In the human tonsil explant tissue blocks, HIV-1 p24 antigen and TZM-bl infectivity steadily increased over  
270 the 12-day infection. NF449, A438079 and AZT, inhibited HIV-1 p24 and HIV-1 productive infection to  
271 statistically significant extent by 8 and 12 DPI. At those same time points, IL-10 and IL-1 $\beta$  cytokine stimulation  
272 steadily increased and those levels positively correlated with TZM-bl infectivity, suggesting a direct relationship  
273 between the extent of infection and IL-10 and IL-1 $\beta$  cytokine stimulation.

274  
275 The P2X-selective antagonists tested, NF449, and A438079, reduced HIV-1-stimulated levels of IL-10 with  
276 statistical significance between 5-12 DPI. Treatment with AZT at the corresponding time points resulted in less  
277 inhibition of IL-10 compared to the infected condition. This suggests that inflammatory signaling may be  
278 blocked not directly through inhibition of productive infection, but through alternative signaling mechanisms.  
279 These observations highlight the unique properties of NF449 and A438079 as novel agents that reduce  
280 inflammatory changes independent of their antiviral properties.

281  
282 Additionally, the drugs were tested for effect on HIV-stimulated IL-1 $\beta$  production. NF449 reduced HIV-1-  
283 stimulated levels modestly at 12 DPI whereas A438079 reduced HIV-1-stimulated levels of IL-1 $\beta$  at 8-12 DPI.  
284 AZT did not reduce IL-1 $\beta$  levels. Of note, A438079 did not have full inhibition of HIV-1 productive infection in  
285 PBMCs, but unexpectedly had strong inhibition of HIV-1 p24 accumulation in human tonsil explants and  
286 reduced IL-10 and IL-1 $\beta$  secretion. This surprising observation suggests that the nature of A438079 inhibition  
287 of productive infection in tonsils may not be ascribed to a direct link between A438079 and HIV-1 entry, but

rather through cytokine-dependent signaling. There are several possible explanations for this phenomenon. The immunomodulatory role of IL-10 may serve to enhance HIV-1 permissively, but when levels of IL-10 are reduced by A438079, cells may be more susceptible to A438079 inhibition of HIV-1 infection. Tonsil tissue represents mixed cellular populations with stromal compartments with altered sensitivity to P2X inhibition as compared to PBMCs (58-60). It will be of interest to explore the cell-type heterogeneity of HIV-1 infection in tonsils to determine the cell type and signaling mechanisms that drive IL-10 and IL-1 $\beta$  production. These directions may lead to the development novel therapeutic agents that retain inhibition of spreading HIV-1 infection and can reduce HIV-1 stimulated levels of IL-10 and IL-1 $\beta$ .

The role of P2X receptors in HIV-1 pathogenesis likely relate to downstream activation of the NLRP3 inflammasome. The NLRP3 activates immature caspase-1 to activated caspase-1, which cleaves and activates pro-IL-1 $\beta$ . These cytokines, among others, play a pivotal role in signaling of other inflammatory cytokines. Emerging evidence suggests a key role for the inflammasome in atherosclerotic disease progression (61-63) (64-71) and in HIV-1 disease (46, 72-77). Inflammasome activation requires two signals, one for priming (i.e. TLR signaling which results in transcriptional regulation), and then activation for inflammasome complex assembly. Together with TLR signaling, P2X7 can signal inflammasome activation and subsequent IL-1 $\beta$  release (78). As the tonsil tissue contains soluble factors that likely include TLR agonists, inflammasome activation is readily measurable with second signal stimulation, i.e. P2X7 activation by HIV-1 infection. HIV-1 infected patients have elevated circulating levels of LPS, which can serve to increase transcriptional activation of pro-inflammatory cytokines (11, 49). Elevated levels of IL-1 $\beta$  are associated with many of the AANCCs seen in HIV-1 infected patients (79-82). Currently, there are multiple clinical trials assessing the safety and efficacy of anti-IL-1 $\beta$  antibodies in cardiovascular disease (83, 84). Canakinumab, a human monoclonal IL-1 $\beta$  antibody, has been shown to significantly decrease arterial inflammation in HIV-1 infected individuals (85). The role of P2X receptors in the secretion of IL-1 $\beta$  may represent a key mechanism for HIV-1 associated inflammation. Elevated IL-1 $\beta$  is observed in HIV-1 infected patients (76, 86-88) and an emerging literature implicates the role of IL-1 $\beta$  in atherosclerotic cardiovascular disease in both HIV-1 infected and uninfected patients (83-85). Intriguing studies in CD4<sup>+</sup> T cells find that pathogen sensor interferon- $\gamma$ -inducible protein 16 (IFI-16) recognition

of HIV-1 DNA can activate the NLRP3 inflammasome that induces pyroptosis and may represent a mechanism for CD4<sup>+</sup> T cell depletion in HIV-1 disease and progression to advanced disease (53-55).

The fact that both IL-10 and IL-1 $\beta$  were together stimulated by HIV-1 infection and reduced by NF449 and A438079 are surprising, given that they have opposing inflammatory effects. IL-10 is an immunomodulatory cytokine with immunosuppressive activities and has been implicated in immune exhaustion and cell death through inhibition of NF- $\kappa$ B activity (89-93). IL-10 activation has been linked to P2X7 signaling with the observation of down-modulation of IL-10 receptor expression with P2X7 activation (94). IL-10 has the potential to impact many areas of HIV-1 infection including CD4 function, chemokine receptor expression, and modulation of replication (95-97). IL-10 gene polymorphisms and epigenetics have been shown to be associated with variations in HIV-1 transmission and disease progression, as long-term non-progressors (LTNP) have low IL-10 levels compared with HIV-1 progressors (98-103). This suggests that IL-10 may be important for modulating the immune response to HIV-1 infection and the high levels of HIV-1-stimulation may account for the relatively low levels of induction of other pro-inflammatory cytokines such as IL-6 and TNF. Further studies are needed to understand the role of IL-10 in HIV-1 disease progression and inflammation, and P2X-selective antagonists may play a role in developing novel therapeutics that target both HIV-1 infection and inhibition of IL-10 signaling.

Figure 7A summarizes the observations of HIV-1 infection and inflammatory cytokine production in both PMBCs and tonsils. While all drugs inhibit HIV-1 infection, A438079 had the least effect on inhibition of HIV-1 infection. It should be noted that IL-10 and IL-1 $\beta$  stimulation were not observed in this system. Since it was not possible to demonstrate HIV-1 specific stimulation of inflammatory cytokines in this model, it was necessary to establish a lymphoid model that would more accurately recapitulate inflammatory cytokine signaling. In the tonsil model, all three drugs inhibited HIV-1 infection to a comparable magnitude in HLACs, while A438079 and AZT inhibited p24 accumulation more than NF449. By comparison, NF449 and A438079 inhibited IL-10 production most strongly while AZT only modestly reduced IL-10 production. Finally, NF449 and A438079 inhibited IL-1 $\beta$  production modestly while AZT did not inhibit IL-1 $\beta$  production.

343 Taken together, we propose the model in Figure 7B, in which P2X-selective antagonists play a role in  
344 inhibiting both HIV-1 infection and HIV-1-stimulated inflammation. The model indicates that NF449 and  
345 A438079 may have different mechanisms of action on HIV-1 entry and inflammation. Stimulation of  
346 inflammatory signaling by P2X7 and TLR4 results in NLRP3-dependent production of IL-1 $\beta$  as well as NF-kB-  
347 dependent regulation of IL-10. NF449 inhibits this inflammation and HIV-1 productive infection in both PBMCs  
348 and tonsil cells, suggesting that the inhibition is not dependent on intact inflammasome signaling, but may act  
349 more directly on HIV-1 entry mechanisms. By contrast, A438079 inhibits HIV-1 productive infection that is  
350 limited to the tonsil system, indicating that this inhibition is dependent on intact NLRP3 signaling mechanisms  
351 that are not activated in PBMCs. The role of cytokine signaling in permissivity to HIV-1 infection in mixed cell  
352 populations is an important area of future investigation as the tonsil tissue model system is important in  
353 understanding the interplay between HIV-1 pathogenesis and the immune response.

354  
355 Here we demonstrate that P2X-selective antagonists have the potential to reduce HIV-1 infection and HIV-  
356 1-stimulated inflammatory cytokine production. We conclude from these studies that P2X-selective antagonists  
357 may represent potential HIV-1 therapeutic options that serve to inhibit HIV-1 replication and innate immune  
358 sensing. Further studies will be necessary to identify selective inhibitors that are amenable to pharmacologic  
359 development and the precise mechanism of their inhibition, but these observations introduce important  
360 prospects for dually active therapeutic options that would reduce the burden of morbidity and mortality of  
361 chronic inflammation in HIV-1-infected individuals.

## 363 **Materials and Methods**

364 **Virus production.** HIV-1 NL-CI contains mCherry in place of *nef*, and *nef* expression is directed by a  
365 downstream internal ribosome entry site (IRES) (44). Pseudoviruses were produced by co-transfecting  
366 293T/17 cells with HIV-1 *rev*- and *env*-expressing plasmids and the pNL4-3Δ*env* R-E- plasmid using the jetPEI  
367 transfection reagent (Polyplus-transfect SA). Supernatants were harvested after 48 hours and clarified by high-  
368 speed centrifugation (Sorvall ST 40R Centrifuge, Thermo Fisher Scientific) at 100,000 x g at 4°C for 2 hours  
369 and 0.45 μm filtration. Single-use aliquots were stored at -80°C. Viral stocks were quantified via enzyme-linked  
370 immunosorbent assay (ELISA), as described below. HIV-1<sub>MN</sub> (X4-tropic) was produced at the AIDS Vaccine  
371 Program, National Cancer Institute as previously described (104-106).

372  
373 **Cells and cell lines.** PBMCs were obtained from de-identified HIV-1 negative blood donors (New York Blood  
374 Center), purified by Ficoll (HyClone) density gradient centrifugation and were maintained in RPMI 1640  
375 medium (Sigma) containing 10% fetal bovine serum (FBS; Sigma), 100 U/ml penicillin (Gibco), 10 U/ml  
376 streptomycin (Gibco), and 2 mM glutamine (Gibco) (complete RPMI). The 293T/17 cell line was used to  
377 produce pseudoviruses and purchased from the American Type Culture Collection. The TZM-bl cell line was  
378 obtained from Dr. John C. Kappes, Dr. Xiaoyun Wu, and Tranzyme Inc. through the NIH ARP. The 293T/17  
379 and TZM-bl cells were maintained in Dulbecco's modified Eagle Medium (DMEM; Sigma) containing 10%  
380 cosmic calf serum (CCS; HyClone) and 100 U/mL penicillin, and 10 U/mL streptomycin, and 2 mM glutamine  
381 (Gibco) (complete DMEM).

382  
383 **Establishment of human explant tonsil model and processing of HLACs.** Human tonsils were collected  
384 from routine tonsillectomy performed at the Mount Sinai Health System in New York by BT under an  
385 Institutional Review Board-approved protocol. Tonsils were collected within several hours of surgery and  
386 dissected into 2 mm tissue blocks. Human tonsil explant tissue blocks were plated 9 per well atop a collagen  
387 sponge GelFoam (Pfizer) in a 6-well plate in ~3 mL media (Costar), as previously described (56). Media was  
388 completely changed every 2-3 days with or without indicated inhibitor and saved in aliquots at -80°C for further  
389 experiments. For HLAC experiments, dissected tissue was passed through a 40-μm cell strainer and purified

390 by Ficoll density-gradient centrifugation, as previously described (51). Cells were plated at  $2.5 \times 10^5$  cells/well  
391 in a round-bottom 96-well plate (Costar) and spun down at  $500 \times g$  for 3 minutes every 2-3 days to replace  
392 media with or without indicated inhibitor. Human tonsil explant tissue blocks and HLACs were maintained in  
393 RPMI 1640 medium (Life Technologies) containing 15% FBS, 2 mM GlutaMAX (Life Technologies), 2 mM L-  
394 glutamine (Corning), 1 mM sodium pyruvate (Corning), 1% MEM non-essential amino acids (Corning), 2.5  
395  $\mu\text{g}/\text{mL}$  Amphotericin B (HyClone), 50  $\text{mg}/\text{mL}$  gentamicin sulfate (Corning), and 0.3  $\text{mg}/\text{ml}$  Timentin  
396 (bioWORLD).

397  
398 **Antagonists.** Inhibitors were tested for the ability to block HIV-1 infection and HIV-1 associated inflammation  
399 at 100  $\mu\text{M}$ , unless otherwise stated. These include NF449 (Tocris), a P2X1 selective antagonist, A438079  
400 (Tocris), a P2X7 selective antagonist, and the reverse transcriptase inhibitor azidothioidine (AZT; Sigma).  
401 NF449 and A438079 were diluted from 10 mM stocks reconstituted in DMSO while AZT was diluted from 10  
402 mM stocks reconstituted in water.

403  
404 **Flow cytometry and gating strategy.** An LSR II flow cytometer (BD Biosciences) was used to detect infection  
405 and viability in PBMCs and HLACs. Viable cells were detected with LIVE/DEAD Fixable Dead Cell Stain (Life  
406 Technologies), an amine reactive fluorescent dye that can penetrate the membranes of dead cells but not live  
407 cell membranes. Samples were stained with LIVE/DEAD Fixable Blue Dead Cell Stain or LIVE/DEAD Fixable  
408 Violet Dead Cell Stain at a concentration of 1:1000 in Wash Buffer (PBS supplemented with 2 mM EDTA and  
409 0.5% bovine serum albumin). Stained cells incubated at  $4^\circ\text{C}$  for 30 minutes, then were washed and fixed in 2%  
410 paraformaldehyde for flow cytometry. All cells were initially discriminated by side scatter (SSC) area versus  
411 forward scatter (FSC) area (SSC-A/FSC-A); doublets were excluded using FSC height (FSC-H) vs FSC-A.  
412 Viability was determined by gating on negative populations for LIVE/DEAD Fixable Dead Cell Stain. Infection  
413 was detected by the presence of mCherry in cells infected with HIV-1 NL-CI. mCherry was detected using the  
414 phycoerythrin-Texas Red (PE-Texas Red) channel, LIVE/DEAD Fixable Violet Dead Cell Stain was detected  
415 with the 3-carboxy-6,8-difluoro-7-hydroxycoumarin (Pacific Blue) channel, and LIVE/DEAD Fixable Blue Dead  
416 Cell Stain was detected with the 4',6-diamidino-2-phenylindole (DAPI) channel. All cells within a single



417 experiment were analyzed using the same instrument settings. Flow cytometry data were exported and  
418 analyzed using FlowJo software, version 9.3.2 (Tree Star, Ashland, OR).

419  
420 **Productive infection in PBMCs.** PBMCs were activated with PHA (4 µg/ml) and IL-2 (50 U/mL) for 3 days  
421 and infected by spinoculation, as previously described (107, 108). Briefly,  $2.5 \times 10^5$  cells were incubated in the  
422 presence or absence of indicated inhibitors in a 96-well flat bottom plate for 30 minutes at 37°C then spun at  
423 1,200 x g for 99 minutes with 47.7 ng HIV-1 NL-CI. After overnight incubation at 37°C, the culture medium was  
424 replaced with complete RPMI containing IL-2 (50 U/ml) and 10 µM AZT. At 48 h after spinoculation, cells were  
425 stained and fixed in 2% paraformaldehyde for flow cytometry, as described above.

426  
427 **Ex vivo infection of human tonsil explant tissue blocks and HLACs.** Human tonsil explant tissue blocks  
428 from each donor were individually inoculated with 5 µl of HIV-1 NL-CI (equivalent to 3.24 ng p24), or left  
429 uninfected in the presence or absence of indicated inhibitors. We measured HIV-1 p24 antigen in harvested  
430 supernatants and infectivity in relative RLUs by TZM-bl assay as described below, as the NL-CI fluorophore  
431 can only be detected in cell-based systems. Data are expressed as a cumulative value to account for total  
432 successive media changes. For HLAC experiments, cells were incubated in the presence or absence of  
433 indicated inhibitors for 30 minutes at 37°C before infection with 25 ng HIV-1 NL-CI p24 per well. Cells were  
434 stained and fixed for flow cytometry, as described above.

435  
436 **p24 ELISA.** Viral stocks and tonsil tissue supernatants were quantified via ELISA with coating antibody D7320,  
437 sheep anti-HIV-1-p24 gag (Aalto Bio Reagents), as previously described (57, 109) . Briefly, anti-p24 capture  
438 antibody was coated on high binding plates (Costar) at 1:200 in 0.1 M NaHCO<sub>3</sub>. After overnight incubation at  
439 room temperature, plates were blocked with 2% nonfat dry milk for 1 h. HIV-1 samples were treated with 1%  
440 Empigen and added to wells, along with titration of p24 standard, at room temperature for 3 h. Alkaline  
441 phosphatase conjugated mouse anti-HIV-1 p24 (CLINIQA) was added (1:8000 in TBST 20% sheep serum)  
442 and incubated for 1 h. Plates were developed with Sapphire Substrate (Tropix) and measured on Fluo Star  
443 Optima plate reader.

444

445 **TZM-bl HIV-1 infectivity assay.** Virus infectivity of supernatants collected from tonsil was measured using a  
446  $\beta$ -galactosidase-based luciferase assay (Promega) with TZM-bl target cells, as previously described (110).  
447 Briefly, TZM-bl cells were plated at  $1.5 \times 10^4$  cells/well in a flat-bottom 96-well plate (Costar). Harvested  
448 supernatants (containing 0.1 ng HIV-1 p24) were added to each well then incubated at 37°C. Media was  
449 exchanged 24 h after incubation and a luciferin-galactoside substrate (6-O- $\beta$ -galactopyranosyl-luciferin) was  
450 added after 48 h. The cleavage of the substrate by  $\beta$ -galactosidase generates luminescent signals measured  
451 in RLU. Each test and control condition was tested in duplicate or triplicate. Assay controls included replicate  
452 wells of TZM-bl cells alone (cell control). The virus inputs were the diluted virus stocks yielding equivalent  
453 RLU (typically ~100,000 RLU) under the different assay conditions. The RLU present in uninfected samples  
454 were subtracted as background for all samples for each time point.

455

456 **Cytokine measurements.** PBMCs were isolated from patient samples and  $2.5 \times 10^5$  cells per well in a 96 well  
457 plate were incubated in the presence or absence of dilutions of inhibitor for 30 minutes. HIV-1<sub>MN</sub> (X4-tropic)  
458 was added at 300 ng/ml in the presence or absence of 1 pg/ml LPS (Sigma) and incubated for 12 hours.  
459 Supernatants were collected from PBMCs or samples of tonsil tissue and were analyzed for IL-10, IL-1 $\beta$ , TNF,  
460 IL-12p70, IL-8, and IL-6 using BD™ CBA Human Inflammatory Cytokines Kit (BD Biosciences). Standard  
461 curves were generated and cytokine concentrations were extrapolated using the FCAP Array software (BD  
462 Biosciences). The measurements indicated are representative of 3 separate PBMC donors and 6 separate  
463 tonsil donors.

464

465 **Statistical analysis and calculations.** Comparisons were performed using GraphPad Prism 7, version 7.0d  
466 (GraphPad Software). DMSO- treated controls were set to 100% and drug-treated conditions were expressed  
467 as a percentage of control. Statistical analyses were performed on inhibition data that reached  $\geq 50\%$  with a  
468 one-tailed student's t-test. A *P* value of less than 0.05 was considered statistically significant.

469

470 **Study Approval.** ISMMS IRB protocol number 06-0980 was approved by the Program for the Protection of  
471 Human Subjects Institutional Review Board of the Mount Sinai Health System (New York, New York, USA). All  
472 patients participating in tonsil analysis gave written informed consent.

#### 474 **Author contributions**

475  
476 AYS and NDD designed and performed experiments. AYS and NDD carried out productive infection assays,  
477 RG, MO, and NB provided reagents and guidance on cytokine measurements. BT contributed the tonsils and  
478 KWH, JAB, and JKL assisted AYS in protocol development and tonsil processing. AYS and THS wrote the  
479 paper. THS and BKC conceived the approach.

#### 481 **Acknowledgements**

482  
483 We would like to thank the members of the Chen laboratory for meaningful discussions. Many thanks to  
484 Maxwell Allison and Elizabeth Osota for their help in preparing samples for tonsil tissue. T. Swartz was funded  
485 by the NIH K08AI20806 and by the Schneider-Lesser Foundation. This work was supported by grants to B.  
486 Chen from NIH, NIAID R01AI074420, NIDA Avant Garde DP1DA028866.

## References

1. **Yoshimura K.** 2017. Current status of HIV/AIDS in the ART era. *J Infect Chemother* **23**:12-16.
2. **Raffetti E, Donato F, Casari S, Castelnuovo F, Sighinolfi L, Bandera A, Maggiolo F, Ladisa N, di Pietro M, Fornabaio C, Digiambenedetto S, Quiros-Roldan E.** 2017. Systemic inflammation-based scores and mortality for all causes in HIV-infected patients: a MASTER cohort study. *BMC Infect Dis* **17**:193.
3. **Tien PC, Choi AI, Zolopa AR, Benson C, Tracy R, Scherzer R, Bacchetti P, Shlipak M, Grunfeld C.** 2010. Inflammation and mortality in HIV-infected adults: analysis of the FRAM study cohort. *J Acquir Immune Defic Syndr* **55**:316-322.
4. **Eastburn A, Scherzer R, Zolopa AR, Benson C, Tracy R, Do T, Bacchetti P, Shlipak M, Grunfeld C, Tien PC.** 2011. Association of low level viremia with inflammation and mortality in HIV-infected adults. *PLoS One* **6**:e26320.
5. **Justice AC, Freiberg MS, Tracy R, Kuller L, Tate JP, Goetz MB, Fiellin DA, Vanasse GJ, Butt AA, Rodriguez-Barradas MC, Gibert C, Oursler KA, Deeks SG, Bryant K, Team VP.** 2012. Does an index composed of clinical data reflect effects of inflammation, coagulation, and monocyte activation on mortality among those aging with HIV? *Clin Infect Dis* **54**:984-994.
6. **Schouten J, Wit FW, Stolte IG, Kootstra NA, van der Valk M, Geerlings SE, Prins M, Reiss P, Group AGCS.** 2014. Cross-sectional comparison of the prevalence of age-associated comorbidities and their risk factors between HIV-infected and uninfected individuals: the AGEHIV cohort study. *Clin Infect Dis* **59**:1787-1797.
7. **Deeks SG.** 2011. HIV infection, inflammation, immunosenescence, and aging. *Annu Rev Med* **62**:141-155.
8. **Aberg JA.** 2006. Management of dyslipidemia and other cardiovascular risk factors in HIV-infected patients: case-based review. *Top HIV Med* **14**:134-139.
9. **Aberg JA.** 2006. The changing face of HIV care: common things really are common. *Ann Intern Med* **145**:463-465.

- 513 10. **Brenchley JM, Price DA, Schacker TW, Asher TE, Silvestri G, Rao S, Kazzaz Z, Bornstein**  
514 **E, Lambotte O, Altmann D, Blazar BR, Rodriguez B, Teixeira-Johnson L, Landay A,**  
515 **Martin JN, Hecht FM, Picker LJ, Lederman MM, Deeks SG, Douek DC.** 2006. Microbial  
516 translocation is a cause of systemic immune activation in chronic HIV infection. *Nat Med*  
517 **12:1365-1371.**
- 518 11. **Vassallo M, Mercie P, Cottalorda J, Ticchioni M, Dellamonica P.** 2012. The role of  
519 lipopolysaccharide as a marker of immune activation in HIV-1 infected patients: a systematic  
520 literature review. *Virol J* **9:174.**
- 521 12. **Hunt PW, Landay AL, Sinclair E, Martinson JA, Hatano H, Emu B, Norris PJ, Busch MP,**  
522 **Martin JN, Brooks C, McCune JM, Deeks SG.** 2011. A low T regulatory cell response may  
523 contribute to both viral control and generalized immune activation in HIV controllers. *PLoS One*  
524 **6:e15924.**
- 525 13. **Hunt PW, Hatano H, Sinclair E, Lee TH, Busch MP, Martin JN, McCune JM, Deeks SG.**  
526 2011. HIV-specific CD4+ T cells may contribute to viral persistence in HIV controllers. *Clin*  
527 *Infect Dis* **52:681-687.**
- 528 14. **Belete HA, Hubmayr RD, Wang S, Singh RD.** 2011. The role of purinergic signaling on  
529 deformation induced injury and repair responses of alveolar epithelial cells. *PLoS One*  
530 **6:e27469.**
- 531 15. **Busillo JM, Azzam KM, Cidlowski JA.** 2011. Glucocorticoids sensitize the innate immune  
532 system through regulation of the NLRP3 inflammasome. *J Biol Chem* **286:38703-38713.**
- 533 16. **Deli T, Csernoch L.** 2008. Extracellular ATP and cancer: an overview with special reference  
534 to P2 purinergic receptors. *Pathol Oncol Res* **14:219-231.**
- 535 17. **Franchi L, Kanneganti TD, Dubyak GR, Nunez G.** 2007. Differential requirement of P2X7  
536 receptor and intracellular K<sup>+</sup> for caspase-1 activation induced by intracellular and extracellular  
537 bacteria. *J Biol Chem* **282:18810-18818.**

- 538 18. **McIlvain HB, Ma L, Ludwig B, Manners MT, Martone RL, Dunlop J, Kaftan EJ, Kennedy**  
539 **JD, Whiteside GT.** 2010. Purinergic receptor-mediated morphological changes in microglia  
540 are transient and independent from inflammatory cytokine release. *Eur J Pharmacol* **643**:202-  
541 210.
- 542 19. **Pillai S, Bikle DD.** 1992. Adenosine triphosphate stimulates phosphoinositide metabolism,  
543 mobilizes intracellular calcium, and inhibits terminal differentiation of human epidermal  
544 keratinocytes. *J Clin Invest* **90**:42-51.
- 545 20. **Riteau N, Gasse P, Fauconnier L, Gombault A, Couegnat M, Fick L, Kanellopoulos J,**  
546 **Quesniaux VF, Marchand-Adam S, Crestani B, Ryffel B, Couillin I.** 2010. Extracellular ATP  
547 is a danger signal activating P2X7 receptor in lung inflammation and fibrosis. *Am J Respir Crit*  
548 *Care Med* **182**:774-783.
- 549 21. **Trautmann A.** 2009. Extracellular ATP in the immune system: more than just a "danger  
550 signal". *Sci Signal* **2**:pe6.
- 551 22. **Burnstock G, Knight GE.** 2004. Cellular distribution and functions of P2 receptor subtypes in  
552 different systems. *Int Rev Cytol* **240**:31-304.
- 553 23. **Collo G, Neidhart S, Kawashima E, Kosco-Vilbois M, North RA, Buell G.** 1997. Tissue  
554 distribution of the P2X7 receptor. *Neuropharmacology* **36**:1277-1283.
- 555 24. **Di Virgilio F.** 2007. Liaisons dangereuses: P2X(7) and the inflammasome. *Trends Pharmacol*  
556 *Sci* **28**:465-472.
- 557 25. **Ferrari D, Pizzirani C, Adinolfi E, Lemoli RM, Curti A, Idzko M, Panther E, Di Virgilio F.**  
558 2006. The P2X7 receptor: a key player in IL-1 processing and release. *J Immunol* **176**:3877-  
559 3883.
- 560 26. **Eltzschig HK, Sitkovsky MV, Robson SC.** 2012. Purinergic signaling during inflammation. *N*  
561 *Engl J Med* **367**:2322-2333.
- 562 27. **Keystone EC, Wang MM, Layton M, Hollis S, McInnes IB, Team DCS.** 2012. Clinical  
563 evaluation of the efficacy of the P2X7 purinergic receptor antagonist AZD9056 on the signs

- 564 and symptoms of rheumatoid arthritis in patients with active disease despite treatment with  
565 methotrexate or sulphasalazine. *Ann Rheum Dis* **71**:1630-1635.
- 566 28. **Stock TC, Bloom BJ, Wei N, Ishaq S, Park W, Wang X, Gupta P, Mebus CA.** 2012. Efficacy  
567 and safety of CE-224,535, an antagonist of P2X7 receptor, in treatment of patients with  
568 rheumatoid arthritis inadequately controlled by methotrexate. *J Rheumatol* **39**:720-727.
- 569 29. **Vergani A, Tezza S, D'Addio F, Fotino C, Liu K, Niewczas M, Bassi R, Molano RD, Kleffel**  
570 **S, Petrelli A, Soleti A, Ammirati E, Frigerio M, Visner G, Grassi F, Ferrero ME, Corradi D,**  
571 **Abdi R, Ricordi C, Sayegh MH, Pileggi A, Fiorina P.** 2013. Long-term heart transplant  
572 survival by targeting the ionotropic purinergic receptor P2X7. *Circulation* **127**:463-475.
- 573 30. **Dubyak GR.** 2012. P2X7 receptor regulation of non-classical secretion from immune effector  
574 cells. *Cell Microbiol* **14**:1697-1706.
- 575 31. **Guo H, Callaway JB, Ting JP.** 2015. Inflammasomes: mechanism of action, role in disease,  
576 and therapeutics. *Nat Med* **21**:677-687.
- 577 32. **Place DE, Kanneganti TD.** 2017. Recent advances in inflammasome biology. *Curr Opin*  
578 *Immunol* **50**:32-38.
- 579 33. **Giroud C, Marin M, Hammonds J, Spearman P, Melikyan GB.** 2015. P2X1 Receptor  
580 Antagonists Inhibit HIV-1 Fusion by Blocking Virus-Coreceptor Interactions. *J Virol* **89**:9368-  
581 9382.
- 582 34. **Swartz TH, Esposito AM, Durham ND, Hartmann BM, Chen BK.** 2014. P2X-selective  
583 purinergic antagonists are strong inhibitors of HIV-1 fusion during both cell-to-cell and cell-free  
584 infection. *J Virol* **88**:11504-11515.
- 585 35. **Sorrell ME, Hauser KF.** 2014. Ligand-gated purinergic receptors regulate HIV-1 Tat and  
586 morphine related neurotoxicity in primary mouse striatal neuron-glia co-cultures. *J*  
587 *Neuroimmune Pharmacol* **9**:233-244.
- 588 36. **Hazleton JE, Berman JW, Eugenin EA.** 2012. Purinergic receptors are required for HIV-1  
589 infection of primary human macrophages. *J Immunol* **188**:4488-4495.

- 590 37. **Graziano F, Desdouits M, Garzetti L, Podini P, Alfano M, Rubartelli A, Furlan R,**  
591 **Benaroch P, Poli G.** 2015. Extracellular ATP induces the rapid release of HIV-1 from virus  
592 containing compartments of human macrophages. *Proc Natl Acad Sci U S A* **112**:E3265-3273.
- 593 38. **Chen Q, Wu H, Tao J, Liu C, Deng Z, Liu Y, Chen G, Liu B, Xu C.** 2017. Effect of naringin  
594 on gp120-induced injury mediated by P2X7 receptors in rat primary cultured microglia. *PLoS*  
595 *One* **12**:e0183688.
- 596 39. **Chen Q, Wu H, Qin S, Liu C, Chen Y, Yang Y, Xu C.** 2016. The P2X7 Receptor Involved in  
597 gp120-Induced Cell Injury in BV2 Microglia. *Inflammation* **39**:1814-1826.
- 598 40. **Tewari M, Seth P.** 2015. Emerging role of P2X7 receptors in CNS health and disease. *Ageing*  
599 *Res Rev* **24**:328-342.
- 600 41. **Menkova-Garnier I, Hocini H, Foucat E, Tisserand P, Bourdery L, Delaugerre C, Benne C,**  
601 **Levy Y, Lelievre JD.** 2016. P2X7 Receptor Inhibition Improves CD34 T-Cell Differentiation in  
602 HIV-Infected Immunological Nonresponders on c-ART. *PLoS Pathog* **12**:e1005571.
- 603 42. **Marin M, Du Y, Giroud C, Kim JH, Qui M, Fu H, Melikyan GB.** 2015. High-Throughput HIV-  
604 Cell Fusion Assay for Discovery of Virus Entry Inhibitors. *Assay Drug Dev Technol* **13**:155-  
605 166.
- 606 43. **Giroud C, Du Y, Marin M, Min Q, Jui NT, Fu H, Melikyan GB.** 2017. Screening and  
607 Functional Profiling of Small-Molecule HIV-1 Entry and Fusion Inhibitors. *Assay Drug Dev*  
608 *Technol* **15**:53-63.
- 609 44. **Cohen GB, Gandhi RT, Davis DM, Mandelboim O, Chen BK, Strominger JL, Baltimore D.**  
610 1999. The selective downregulation of class I major histocompatibility complex proteins by  
611 HIV-1 protects HIV-infected cells from NK cells. *Immunity* **10**:661-671.
- 612 45. **Li H, Zony C, Chen P, Chen BK.** 2017. Reduced Potency and Incomplete Neutralization of  
613 Broadly Neutralizing Antibodies against Cell-to-Cell Transmission of HIV-1 with Transmitted  
614 Founder Envs. *J Virol* **91**.



- 615 46. **Hernandez JC, Latz E, Urcuqui-Inchima S.** 2014. HIV-1 induces the first signal to activate  
616 the NLRP3 inflammasome in monocyte-derived macrophages. *Intervirology* **57**:36-42.
- 617 47. **He Y, Hara H, Nunez G.** 2016. Mechanism and Regulation of NLRP3 Inflammasome  
618 Activation. *Trends Biochem Sci* **41**:1012-1021.
- 619 48. **Bukh AR, Melchjorsen J, Offersen R, Jensen JM, Toft L, Stovring H, Ostergaard L,  
620 Tolstrup M, Sogaard OS.** 2011. Endotoxemia is associated with altered innate and adaptive  
621 immune responses in untreated HIV-1 infected individuals. *PLoS One* **6**:e21275.
- 622 49. **Marchetti G, Tincati C, Silvestri G.** 2013. Microbial translocation in the pathogenesis of HIV  
623 infection and AIDS. *Clin Microbiol Rev* **26**:2-18.
- 624 50. **Doitsh G, Greene WC.** 2016. Dissecting How CD4 T Cells Are Lost During HIV Infection. *Cell*  
625 *Host Microbe* **19**:280-291.
- 626 51. **Munoz-Arias I, Doitsh G, Yang Z, Sowinski S, Ruelas D, Greene WC.** 2015. Blood-Derived  
627 CD4 T Cells Naturally Resist Pyroptosis during Abortive HIV-1 Infection. *Cell Host Microbe*  
628 **18**:463-470.
- 629 52. **Galloway NL, Doitsh G, Monroe KM, Yang Z, Munoz-Arias I, Levy DN, Greene WC.** 2015.  
630 Cell-to-Cell Transmission of HIV-1 Is Required to Trigger Pyroptotic Death of Lymphoid-  
631 Tissue-Derived CD4 T Cells. *Cell Rep* **12**:1555-1563.
- 632 53. **Doitsh G, Galloway NL, Geng X, Yang Z, Monroe KM, Zepeda O, Hunt PW, Hatano H,  
633 Sowinski S, Munoz-Arias I, Greene WC.** 2014. Cell death by pyroptosis drives CD4 T-cell  
634 depletion in HIV-1 infection. *Nature* **505**:509-514.
- 635 54. **Monroe KM, Yang Z, Johnson JR, Geng X, Doitsh G, Krogan NJ, Greene WC.** 2014. IFI16  
636 DNA sensor is required for death of lymphoid CD4 T cells abortively infected with HIV. *Science*  
637 **343**:428-432.
- 638 55. **Doitsh G, Cavrois M, Lassen KG, Zepeda O, Yang Z, Santiago ML, Hebbeler AM, Greene  
639 WC.** 2010. Abortive HIV infection mediates CD4 T cell depletion and inflammation in human  
640 lymphoid tissue. *Cell* **143**:789-801.

- 641 56. **Glushakova S, Baibakov B, Margolis LB, Zimmerberg J.** 1995. Infection of human tonsil  
642 histocultures: a model for HIV pathogenesis. *Nat Med* **1**:1320-1322.
- 643 57. **Esposito AM, Cheung P, Swartz TH, Li H, Tsibane T, Durham ND, Basler CF, Felsenfeld**  
644 **DP, Chen BK.** 2016. A high throughput Cre-lox activated viral membrane fusion assay  
645 identifies pharmacological inhibitors of HIV entry. *Virology* **490**:6-16.
- 646 58. **Unutmaz D, KewalRamani VN, Marmon S, Littman DR.** 1999. Cytokine signals are sufficient  
647 for HIV-1 infection of resting human T lymphocytes. *J Exp Med* **189**:1735-1746.
- 648 59. **Kedzierska K, Crowe SM.** 2001. Cytokines and HIV-1: interactions and clinical implications.  
649 *Antivir Chem Chemother* **12**:133-150.
- 650 60. **Reuter MA, Pombo C, Betts MR.** 2012. Cytokine production and dysregulation in HIV  
651 pathogenesis: lessons for development of therapeutics and vaccines. *Cytokine Growth Factor*  
652 *Rev* **23**:181-191.
- 653 61. **Razani B, Feng C, Coleman T, Emanuel R, Wen H, Hwang S, Ting JP, Virgin HW, Kastan**  
654 **MB, Semenkovich CF.** 2012. Autophagy links inflammasomes to atherosclerotic progression.  
655 *Cell Metab* **15**:534-544.
- 656 62. **van der Heijden T, Kritikou E, Venema W, van Duijn J, van Santbrink PJ, Slutter B, Foks**  
657 **AC, Bot I, Kuiper J.** 2017. NLRP3 Inflammasome Inhibition by MCC950 Reduces  
658 Atherosclerotic Lesion Development in Apolipoprotein E-Deficient Mice-Brief Report.  
659 *Arterioscler Thromb Vasc Biol* **37**:1457-1461.
- 660 63. **Li Y, Xu S, Jiang B, Cohen RA, Zang M.** 2013. Activation of sterol regulatory element binding  
661 protein and NLRP3 inflammasome in atherosclerotic lesion development in diabetic pigs. *PLoS*  
662 *One* **8**:e67532.
- 663 64. **Baldrighi M, Mallat Z, Li X.** 2017. NLRP3 inflammasome pathways in atherosclerosis.  
664 *Atherosclerosis* **267**:127-138.

- 665 65. **Wang R, Wang Y, Mu N, Lou X, Li W, Chen Y, Fan D, Tan H.** 2017. Activation of NLRP3  
666 inflammasomes contributes to hyperhomocysteinemia-aggravated inflammation and  
667 atherosclerosis in apoE-deficient mice. *Lab Invest* **97**:922-934.
- 668 66. **Hoseini Z, Sepahvand F, Rashidi B, Sahebkar A, Masoudifar A, Mirzaei H.** 2017. NLRP3  
669 inflammasome: Its regulation and involvement in atherosclerosis. *J Cell Physiol*  
670 doi:10.1002/jcp.25930.
- 671 67. **Wang Y, Han Z, Fan Y, Zhang J, Chen K, Gao L, Zeng H, Cao J, Wang C.** 2017. MicroRNA-  
672 9 Inhibits NLRP3 Inflammasome Activation in Human Atherosclerosis Inflammation Cell  
673 Models through the JAK1/STAT Signaling Pathway. *Cell Physiol Biochem* **41**:1555-1571.
- 674 68. **Karasawa T, Takahashi M.** 2017. Role of NLRP3 Inflammasomes in Atherosclerosis. *J*  
675 *Atheroscler Thromb* **24**:443-451.
- 676 69. **Li WL, Hua LG, Qu P, Yan WH, Ming C, Jun YD, Yuan LD, Nan N.** 2016. NLRP3  
677 inflammasome: a novel link between lipoproteins and atherosclerosis. *Arch Med Sci* **12**:950-  
678 958.
- 679 70. **Paramel Varghese G, Folkersen L, Strawbridge RJ, Halvorsen B, Yndestad A, Ranheim**  
680 **T, Krohg-Sorensen K, Skjelland M, Espevik T, Aukrust P, Lengquist M, Hedin U, Jansson**  
681 **JH, Fransen K, Hansson GK, Eriksson P, Sirsjo A.** 2016. NLRP3 Inflammasome Expression  
682 and Activation in Human Atherosclerosis. *J Am Heart Assoc* **5**.
- 683 71. **Shi X, Xie WL, Kong WW, Chen D, Qu P.** 2015. Expression of the NLRP3 Inflammasome in  
684 Carotid Atherosclerosis. *J Stroke Cerebrovasc Dis* **24**:2455-2466.
- 685 72. **Chivero ET, Guo ML, Periyasamy P, Liao K, Callen SE, Buch S.** 2017. HIV-1 Tat Primes  
686 and Activates Microglial NLRP3 Inflammasome-Mediated Neuroinflammation. *J Neurosci*  
687 **37**:3599-3609.
- 688 73. **Toksoy A, Sennefelder H, Adam C, Hofmann S, Trautmann A, Goebeler M, Schmidt M.**  
689 2017. Potent NLRP3 Inflammasome Activation by the HIV Reverse Transcriptase Inhibitor  
690 Abacavir. *J Biol Chem* **292**:2805-2814.

- 691 74. **Mamik MK, Hui E, Branton WG, McKenzie BA, Chisholm J, Cohen EA, Power C.** 2017.  
692 HIV-1 Viral Protein R Activates NLRP3 Inflammasome in Microglia: implications for HIV-1  
693 Associated Neuroinflammation. *J Neuroimmune Pharmacol* **12**:233-248.
- 694 75. **Haque S, Lan X, Wen H, Lederman R, Chawla A, Attia M, Bongu RP, Husain M, Mikulak J,**  
695 **Saleem MA, Popik W, Malhotra A, Chander PN, Singhal PC.** 2016. HIV Promotes NLRP3  
696 Inflammasome Complex Activation in Murine HIV-Associated Nephropathy. *Am J Pathol*  
697 **186**:347-358.
- 698 76. **Guo H, Gao J, Taxman DJ, Ting JP, Su L.** 2014. HIV-1 infection induces interleukin-1beta  
699 production via TLR8 protein-dependent and NLRP3 inflammasome mechanisms in human  
700 monocytes. *J Biol Chem* **289**:21716-21726.
- 701 77. **Pontillo A, Brandao LA, Guimaraes RL, Segat L, Athanasakis E, Crovella S.** 2010. A  
702 3'UTR SNP in NLRP3 gene is associated with susceptibility to HIV-1 infection. *J Acquir*  
703 *Immune Defic Syndr* **54**:236-240.
- 704 78. **Mariathasan S, Monack DM.** 2007. Inflammasome adaptors and sensors: intracellular  
705 regulators of infection and inflammation. *Nat Rev Immunol* **7**:31-40.
- 706 79. **Schechter ME, Andrade BB, He T, Richter GH, Tosh KW, Policicchio BB, Singh A,**  
707 **Raetz KD, Sheikh V, Ma D, Brocca-Cofano E, Apetrei C, Tracy R, Ribeiro RM, Sher A,**  
708 **Francischetti IMB, Pandrea I, Sereti I.** 2017. Inflammatory monocytes expressing tissue  
709 factor drive SIV and HIV coagulopathy. *Sci Transl Med* **9**.
- 710 80. **Kim CJ, Rousseau R, Huibner S, Kovacs C, Benko E, Shahabi K, Kandel G, Ostrowski M,**  
711 **Kaul R.** 2017. Impact of intensified antiretroviral therapy during early HIV infection on gut  
712 immunology and inflammatory blood biomarkers. *AIDS* **31**:1529-1534.
- 713 81. **Merlin JS, Westfall AO, Heath SL, Goodin BR, Stewart JC, Sorge RE, Younger J.** 2017.  
714 Brief Report: IL-1beta Levels Are Associated With Chronic Multisite Pain in People Living With  
715 HIV. *J Acquir Immune Defic Syndr* **75**:e99-e103.

- 716 82. **Tufa DM, Ahmad F, Chatterjee D, Ahrenstorf G, Schmidt RE, Jacobs R.** 2016. Brief  
717 Report: HIV-1 Infection Results in Increased Frequency of Active and Inflammatory S1anDCs  
718 that Produce High Level of IL-1beta. *J Acquir Immune Defic Syndr* **73**:34-38.
- 719 83. **Ridker PM, Everett BM, Thuren T, MacFadyen JG, Chang WH, Ballantyne C, Fonseca F,**  
720 **Nicolau J, Koenig W, Anker SD, Kastelein JJP, Cornel JH, Pais P, Pella D, Genest J,**  
721 **Cifkova R, Lorenzatti A, Forster T, Kobalava Z, Vida-Simiti L, Flather M, Shimokawa H,**  
722 **Ogawa H, Dellborg M, Rossi PRF, Troquay RPT, Libby P, Glynn RJ, Group CT.** 2017.  
723 Antiinflammatory Therapy with Canakinumab for Atherosclerotic Disease. *N Engl J Med*  
724 **377**:1119-1131.
- 725 84. **Pashun RA, Frishman WH.** 2015. Therapeutic Role of Innovative Anti-Inflammatory  
726 Medications in the Prevention of Acute Coronary Syndrome. *Cardiol Rev* **23**:252-260.
- 727 85. **Hsue P, Deeks S, Ishai AE, Hur S, Li D, Sterman F, Lalezari J, Rupert A, Ganz P, Tawakol**  
728 **A.** 2017. IL-1 $\beta$  inhibition significantly reduces atherosclerotic inflammation in treated HIV.,  
729 abstr Conference on Retroviruses and Opportunistic Infections, Seattle, WA,
- 730 86. **Allers K, Fehr M, Conrad K, Epple HJ, Schurmann D, Geelhaar-Karsch A, Schinnerling**  
731 **K, Moos V, Schneider T.** 2014. Macrophages accumulate in the gut mucosa of untreated HIV-  
732 infected patients. *J Infect Dis* **209**:739-748.
- 733 87. **Shive CL, Mudd JC, Funderburg NT, Sieg SF, Kyi B, Bazdar DA, Mangioni D, Gori A,**  
734 **Jacobson JM, Brooks AD, Hardacre J, Ammori J, Estes JD, Schacker TW, Rodriguez B,**  
735 **Lederman MM.** 2014. Inflammatory cytokines drive CD4+ T-cell cycling and impaired  
736 responsiveness to interleukin 7: implications for immune failure in HIV disease. *J Infect Dis*  
737 **210**:619-629.
- 738 88. **Liu CM, Osborne BJ, Hungate BA, Shahabi K, Huibner S, Lester R, Dwan MG, Kovacs C,**  
739 **Contente-Cuomo TL, Benko E, Aziz M, Price LB, Kaul R.** 2014. The semen microbiome and  
740 its relationship with local immunology and viral load in HIV infection. *PLoS Pathog*  
741 **10**:e1004262.

- 742 89. **Kwon DS, Angin M, Hongo T, Law KM, Johnson J, Porichis F, Hart MG, Pavlik DF, Tighe**  
743 **DP, Kavanagh DG, Streeck H, Addo MM, Kaufmann DE.** 2012. CD4+ CD25+ regulatory T  
744 cells impair HIV-1-specific CD4 T cell responses by upregulating interleukin-10 production in  
745 monocytes. *J Virol* **86**:6586-6594.
- 746 90. **Said EA, Dupuy FP, Trautmann L, Zhang Y, Shi Y, El-Far M, Hill BJ, Noto A, Ancuta P,**  
747 **Peretz Y, Fonseca SG, Van Grevenynghe J, Boulassel MR, Bruneau J, Shoukry NH,**  
748 **Routy JP, Douek DC, Haddad EK, Sekaly RP.** 2010. Programmed death-1-induced  
749 interleukin-10 production by monocytes impairs CD4+ T cell activation during HIV infection.  
750 *Nat Med* **16**:452-459.
- 751 91. **Porichis F, Hart MG, Zupkosky J, Barblu L, Kwon DS, McMullen A, Brennan T, Ahmed R,**  
752 **Freeman GJ, Kavanagh DG, Kaufmann DE.** 2014. Differential impact of PD-1 and/or  
753 interleukin-10 blockade on HIV-1-specific CD4 T cell and antigen-presenting cell functions. *J*  
754 *Virol* **88**:2508-2518.
- 755 92. **Mosser DM, Zhang X.** 2008. Interleukin-10: new perspectives on an old cytokine. *Immunol*  
756 *Rev* **226**:205-218.
- 757 93. **Ouyang W, Rutz S, Crellin NK, Valdez PA, Hymowitz SG.** 2011. Regulation and functions of  
758 the IL-10 family of cytokines in inflammation and disease. *Annu Rev Immunol* **29**:71-109.
- 759 94. **Rizzo R, Ferrari D, Melchiorri L, Stignani M, Gulinelli S, Baricordi OR, Di Virgilio F.** 2009.  
760 Extracellular ATP acting at the P2X7 receptor inhibits secretion of soluble HLA-G from human  
761 monocytes. *J Immunol* **183**:4302-4311.
- 762 95. **Brockman MA, Kwon DS, Tighe DP, Pavlik DF, Rosato PC, Sela J, Porichis F, Le Gall S,**  
763 **Waring MT, Moss K, Jessen H, Pereyra F, Kavanagh DG, Walker BD, Kaufmann DE.**  
764 2009. IL-10 is up-regulated in multiple cell types during viremic HIV infection and reversibly  
765 inhibits virus-specific T cells. *Blood* **114**:346-356.
- 766 96. **Kwon DS, Kaufmann DE.** 2010. Protective and detrimental roles of IL-10 in HIV  
767 pathogenesis. *Eur Cytokine Netw* **21**:208-214.

- 768 97. **Liu J, Zhan W, Kim CJ, Clayton K, Zhao H, Lee E, Cao JC, Ziegler B, Gregor A, Yue FY,**  
769 **Huibner S, MacParland S, Schwartz J, Song HH, Benko E, Gyenes G, Kovacs C, Kaul R,**  
770 **Ostrowski M.** 2014. IL-10-producing B cells are induced early in HIV-1 infection and suppress  
771 HIV-1-specific T cell responses. *PLoS One* **9**:e89236.
- 772 98. **de Medeiros RM, Valverde-Villegas JM, Junqueira DM, Graf T, Lindenau JD, de Mello**  
773 **MG, Vianna P, Almeida SE, Chies JA.** 2016. Rapid and Slow Progressors Show Increased  
774 IL-6 and IL-10 Levels in the Pre-AIDS Stage of HIV Infection. *PLoS One* **11**:e0156163.
- 775 99. **Chatterjee A, Rathore A, Sivarama P, Yamamoto N, Dhole TN.** 2009. Genetic association of  
776 IL-10 gene promoter polymorphism and HIV-1 infection in North Indians. *J Clin Immunol* **29**:71-  
777 77.
- 778 100. **Singh S, Sharma A, Arora SK.** 2016. Combination of low producer AA-genotypes in IFN-  
779 gamma and IL-10 genes makes a high risk genetic variant for HIV disease progression.  
780 *Cytokine* **77**:135-144.
- 781 101. **Freitas FB, Lima SS, Feitosa RN, Azevedo VN, Ishak Mde O, Ishak R, Vallinoto AC.** 2015.  
782 Polymorphisms in the IFNgamma, IL-10, and TGFbeta genes may be associated with HIV-1  
783 infection. *Dis Markers* **2015**:248571.
- 784 102. **Naicker DD, Wang B, Losina E, Zupkosky J, Bryan S, Reddy S, Jaggernath M, Mokgoro**  
785 **M, Goulder PJ, Kaufmann DE, Ndung'u T.** 2012. Association of IL-10-promoter genetic  
786 variants with the rate of CD4 T-cell loss, IL-10 plasma levels, and breadth of cytotoxic T-cell  
787 lymphocyte response during chronic HIV-1 infection. *Clin Infect Dis* **54**:294-302.
- 788 103. **Shrestha S, Wiener HW, Aissani B, Song W, Shendre A, Wilson CM, Kaslow RA, Tang J.**  
789 2010. Interleukin-10 (IL-10) pathway: genetic variants and outcomes of HIV-1 infection in  
790 African American adolescents. *PLoS One* **5**:e13384.
- 791 104. **O'Brien M, Manches O, Wilen C, Gopal R, Huq R, Wu V, Sunseri N, Bhardwaj N.** 2016.  
792 CD4 Receptor is a Key Determinant of Divergent HIV-1 Sensing by Plasmacytoid Dendritic  
793 Cells. *PLoS Pathog* **12**:e1005553.

- 794 105. **Beignon AS, McKenna K, Skoberne M, Manches O, DaSilva I, Kavanagh DG, Larsson M,**  
795 **Gorelick RJ, Lifson JD, Bhardwaj N.** 2005. Endocytosis of HIV-1 activates plasmacytoid  
796 dendritic cells via Toll-like receptor-viral RNA interactions. *J Clin Invest* **115**:3265-3275.
- 797 106. **Manches O, Munn D, Fallahi A, Lifson J, Chaperot L, Plumas J, Bhardwaj N.** 2008. HIV-  
798 activated human plasmacytoid DCs induce Tregs through an indoleamine 2,3-dioxygenase-  
799 dependent mechanism. *J Clin Invest* **118**:3431-3439.
- 800 107. **Durham ND, Yewdall AW, Chen P, Lee R, Zony C, Robinson JE, Chen BK.** 2012.  
801 Neutralization resistance of virological synapse-mediated HIV-1 Infection is regulated by the  
802 gp41 cytoplasmic tail. *J Virol* **86**:7484-7495.
- 803 108. **Durham ND, Chen BK.** 2015. HIV-1 Cell-Free and Cell-to-Cell Infections Are Differentially  
804 Regulated by Distinct Determinants in the Env gp41 Cytoplasmic Tail. *J Virol* **89**:9324-9337.
- 805 109. **Moore JP, McKeating JA, Weiss RA, Sattentau QJ.** 1990. Dissociation of gp120 from HIV-1  
806 virions induced by soluble CD4. *Science* **250**:1139-1142.
- 807 110. **Li M, Gao F, Mascola JR, Stamatatos L, Polonis VR, Koutsoukos M, Voss G, Goepfert P,**  
808 **Gilbert P, Greene KM, Bilska M, Kothe DL, Salazar-Gonzalez JF, Wei X, Decker JM, Hahn**  
809 **BH, Montefiori DC.** 2005. Human immunodeficiency virus type 1 env clones from acute and  
810 early subtype B infections for standardized assessments of vaccine-elicited neutralizing  
811 antibodies. *J Virol* **79**:10108-10125.
- 812



## 813 FIGURES

### 815 **Figure 1. NF449 and A438079 inhibit HIV-1 productive infection in PBMCs with minimal inhibition of**

816 **inflammatory cytokines.** (A) PBMCs were isolated, activated, and infected with HIV-1 NL-CI (X4-tropic) for 48  
817 hours. Cells were fixed and analyzed by flow cytometry then normalized to the HIV-1 infected condition for  
818 productive infection and (B) viability. (C) PBMCs were isolated and immediately exposed to HIV-1<sub>MN</sub> (X4-tropic)  
819 for 12 hours in the presence or absence of LPS (1 pg/ml). Supernatants were collected and subjected to  
820 cytokine bead array (BD) for analysis of production of IL-10, IL-1b, IL-6, IL-8 IL-12, and TNF. Mean values  $\pm$   
821 SEM are represented for IL-10 and IL-1 $\beta$  from three donors. \*,  $p \leq 0.05$ , \*\*,  $p \leq 0.01$ , \*\*\*,  $p \leq 0.001$ .

### 823 **Figure 2. Human lymphoid aggregate culture (HLAC) of tonsil explant model supports HIV-1 infection.**

824 (A) Human tonsil explants were collected, dissected, homogenized and passed through a cell strainer. Cells  
825 were subject to Ficoll fractionation and human lymphoid aggregate cells (HLACs) were plated, then infected  
826 with HIV-1 NL-CI. Cells were collected on 0, 2, 5, 8, and 12 DPI. (B) HLACs were collected on the indicated  
827 days and analyzed by flow cytometry for productive infection by NL-CI mCherry fluorescence. Infected cells  
828 were quantified by the percentage of positive PE-Texas Red events (C) HLACs were analyzed by flow  
829 cytometry to quantify viable cells. Viable cells were quantified by the percentage of negative DAPI events (D)  
830 Representative flow cytometry plots of uninfected and infected cells are shown for LIVE/DEAD Fixable Dead  
831 Cell staining (Thermo) by flow cytometry, indicating viability of the 12 day infection time course. (D)  
832 Representative flow cytometry plots of uninfected and infected cells are shown for mCherry signal as indicative  
833 of HIV-1 productive infection. Mean values  $\pm$  SEM are represented from three donors. \*,  $p \leq 0.05$ , \*\*,  $p \leq 0.01$ ,  
834 \*\*\*,  $p \leq 0.001$ .

### 836 **Figure 3. NF449, A438079, and AZT block HIV-1 replication in HLACs.** HLACs were collected on 0, 2, 5, 8,

837 and 12 DPI. (A) HLACs were analyzed by flow cytometry to quantify viable cells. (B) HLACs were analyzed by  
838 flow cytometry for productive infection by NL-CI mCherry fluorescence. (C) NF449, A438079 and AZT were  
839 tested for dose-dependent inhibition in infected HLACs at 8 DPI by a 1:5 titration down from 100  $\mu$ M. Mean  
840 values  $\pm$  SEM are represented from two donors \*,  $p \leq 0.05$ , \*\*,  $p \leq 0.01$ , \*\*\*,  $p \leq 0.001$ .

841

842 **Figure 4. HIV-1 infection and inhibition in human tonsil explant tissue blocks.** (A) Human tonsil explant  
843 tissue blocks were collected, dissected and plated in blocks on GelFoam for 24 hours prior to infection. Blocks  
844 were infected with HIV-1 NL-CI. Supernatants were collected on 2, 5, 8, and 12 DPI. (B) Supernatants  
845 collected from human tonsil explant tissue blocks at the indicated times were measured for HIV-1 p24 by  
846 ELISA. Unfilled circles indicate uninfected samples and black circles indicate infected samples. (C)  
847 Supernatants from human tonsil explant tissue blocks on each day were tested for HIV-1 infectivity as  
848 quantified by TZM-bl assay. (D) Human tonsil explants were infected with HIV-1 NL-CI in the presence or  
849 absence of indicated inhibitors (100  $\mu$ M). Supernatants were collected on 2, 5, 8, and 12 DPI after infection.  
850 HIV-1 p24 antigen levels were measured by ELISA in samples in which infected tonsils were incubated in the  
851 presence or absence of inhibitors NF449, A438079, and AZT at 100 $\mu$ M. Data represent cumulative HIV-1 p24  
852 production by adding the measurements at each successive time point. Mean values  $\pm$  SEM are represented  
853 from six donors \*,  $p \leq 0.05$ , \*\*,  $p \leq 0.01$ , \*\*\*,  $p \leq 0.001$ .

854

855 **Figure 5. HIV-1 stimulates production of IL-10 and IL-1 $\beta$  in human tonsil explant model.** Human tonsil  
856 explant tissue blocks were infected with HIV-1 NL-CI. Supernatants were collected on 2, 5, 8, and 12 DPI. (A)  
857 Cytokines IL-10, IL-1 $\beta$ , TNF, IL-12, IL-8, and IL-6 were measured in the harvested supernatants, quantified by  
858 CBA (BD Biosciences) and analyzed by flow cytometry. Data represent cumulative cytokine production by  
859 adding the measurements at each successive time point. Mean values  $\pm$  SEM are represented from six donors  
860 \*,  $p \leq 0.05$ , \*\*,  $p \leq 0.01$ , \*\*\*,  $p \leq 0.001$ . (B) Quantification of TZM-bl infectivity by RLU and cytokine levels were  
861 compared by regression analysis for IL-10 and IL-1 $\beta$ . A positive correlation was identified between RLU and IL-  
862 10 and IL-1 $\beta$ . Mean values  $\pm$  SEM are represented from five donors \*,  $p \leq 0.05$ , \*\*,  $p \leq 0.01$ , \*\*\*,  $p \leq 0.001$ .

863

864 **Figure 6. NF449 and A438079 reduce HIV-1 induced elevated cytokines IL-10 and IL-1 $\beta$  in *ex vivo***  
865 **human tonsils.** Human tonsil explants were infected with HIV-1 NL-CI in the presence or absence of indicated  
866 inhibitors (100  $\mu$ M). (A) IL-10 and (B) IL-1 $\beta$  were measured from supernatants harvested on 2, 5, 8, and 12 DPI  
867 in the presence or absence of inhibitors NF449, A438079, and AZT. Cytokines were measured in the  
868 supernatants harvested samples and quantified by CBA (BD Biosciences) and analyzed by flow cytometry.

869 Data represent cumulative cytokine production by summing the measurements at each successive time point.

870 Mean values  $\pm$  SEM are represented from six donors \*,  $p \leq 0.05$ , \*\*,  $p \leq 0.01$ , \*\*\*,  $p \leq 0.001$ .

871

872 **Figure 7. Model for signaling in HIV-1 mediated inflammation.** (A) Table summarizing observations from  
873 drug activity across PMBC and tonsil models. Arrows indicate relative magnitude of effect of inhibition in each  
874 of the models depicted. (B) NF449 inhibits HIV-1 productive infection and downstream signaling of the NLRP3  
875 inflammasome. This pathway is activated in concert with TLR4 receptor activation which can drive caspase-1  
876 to cleave pro-IL-1 $\beta$  to mature IL-1 $\beta$ . Mature IL-1 $\beta$  can be secreted or induce pyroptosis in CD4<sup>+</sup> T-cells. This  
877 signaling can also activate NF-kB dependent transcriptional regulation of IL-10. Inhibition of this mechanism by  
878 NF449 may explain enhanced cell survival in tonsil cells. A438079, by contrast, may act directly on P2X7 to  
879 inhibit receptor signaling that is required for HIV-1 entry. P2X7 inhibition results in the inability to activate the  
880 NLRP3 inflammasome and pyroptosis in tonsil cells, which does not occur in PBMCs. Therefore, A438079  
881 depends on intact inflammasome signaling to exert inhibition on HIV-1 productive infection.

882

883

**A**

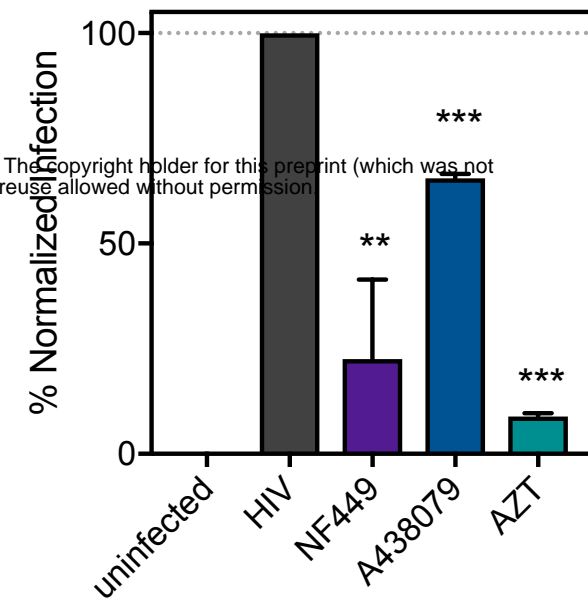

**B**

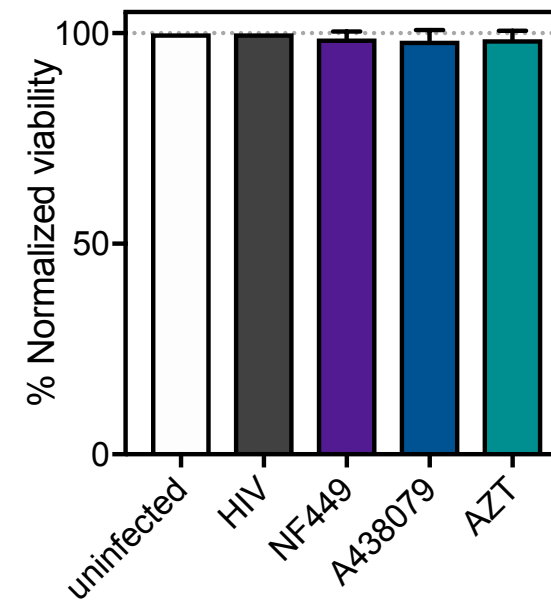

**C**

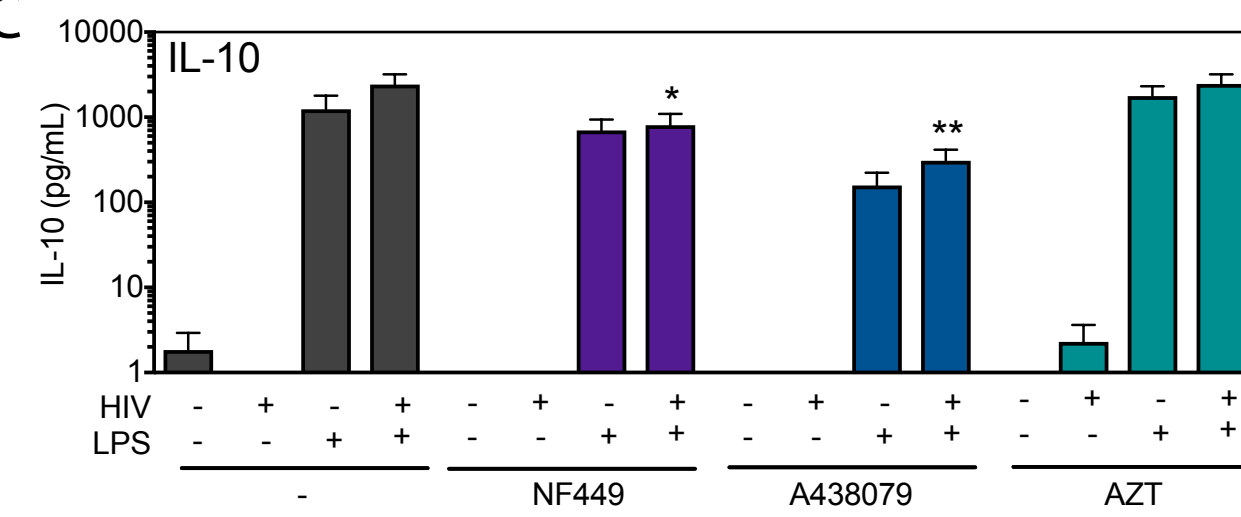

**D**

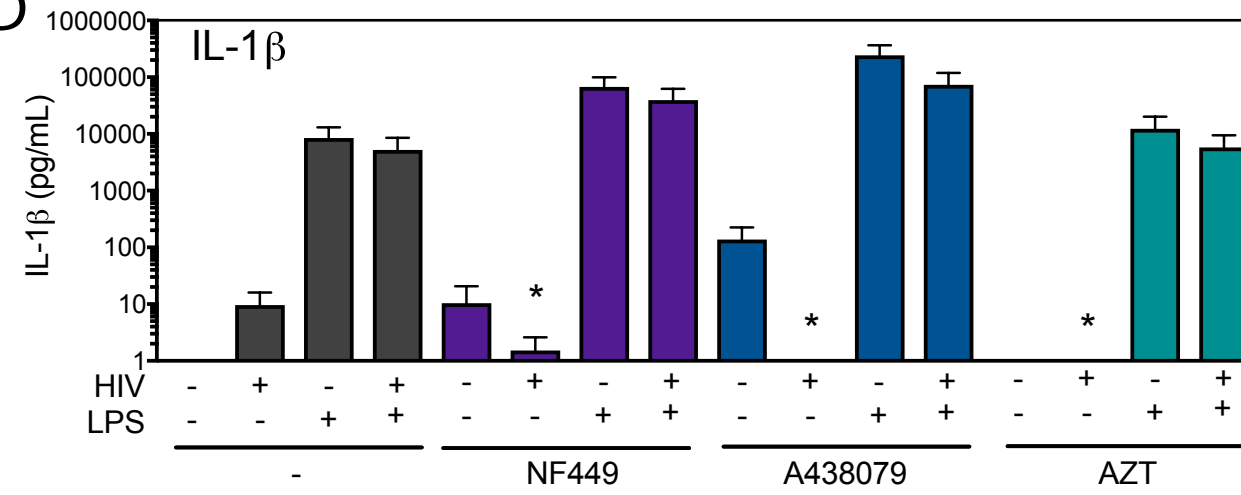

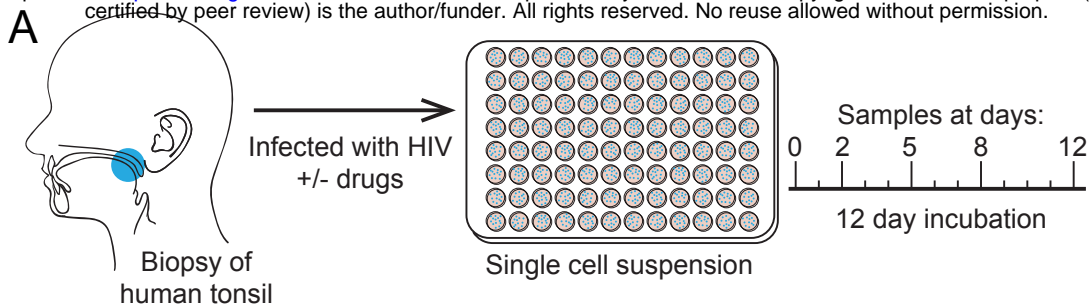

J Gregory ©2017 Mount Sinai Health System

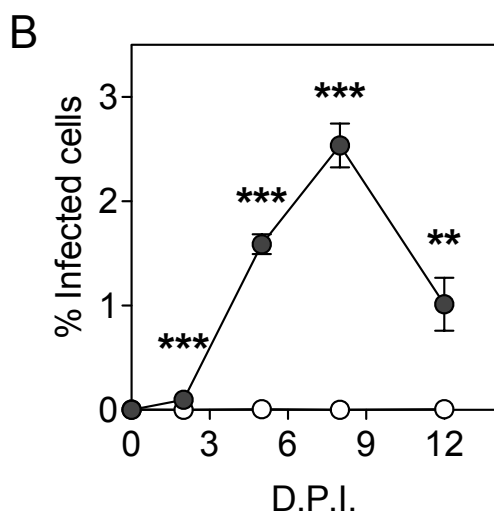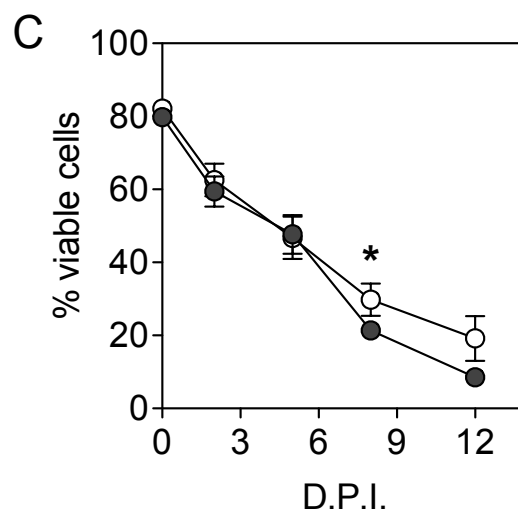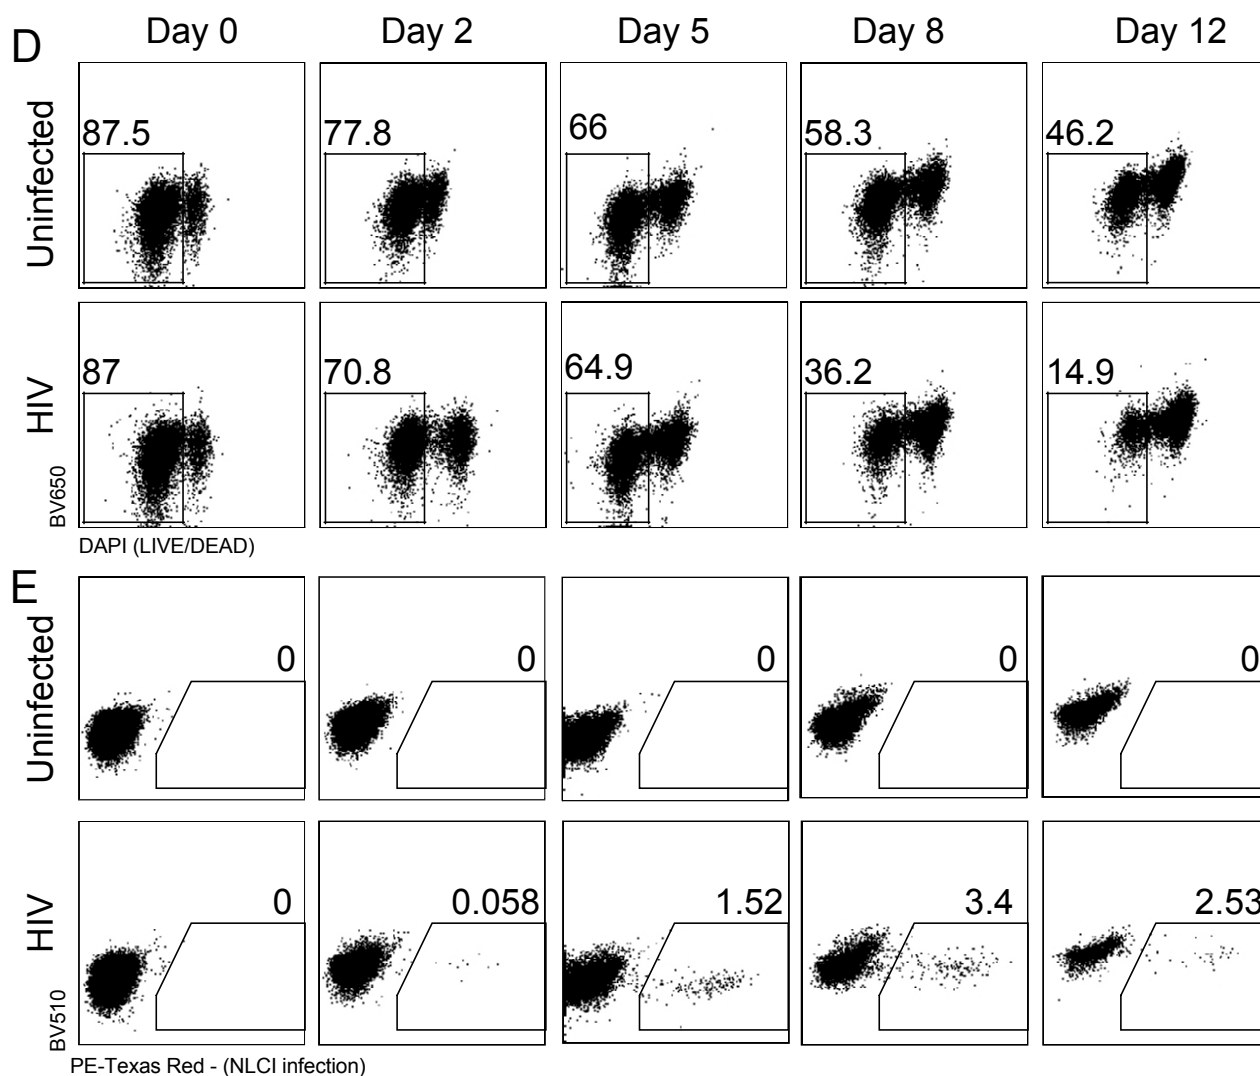

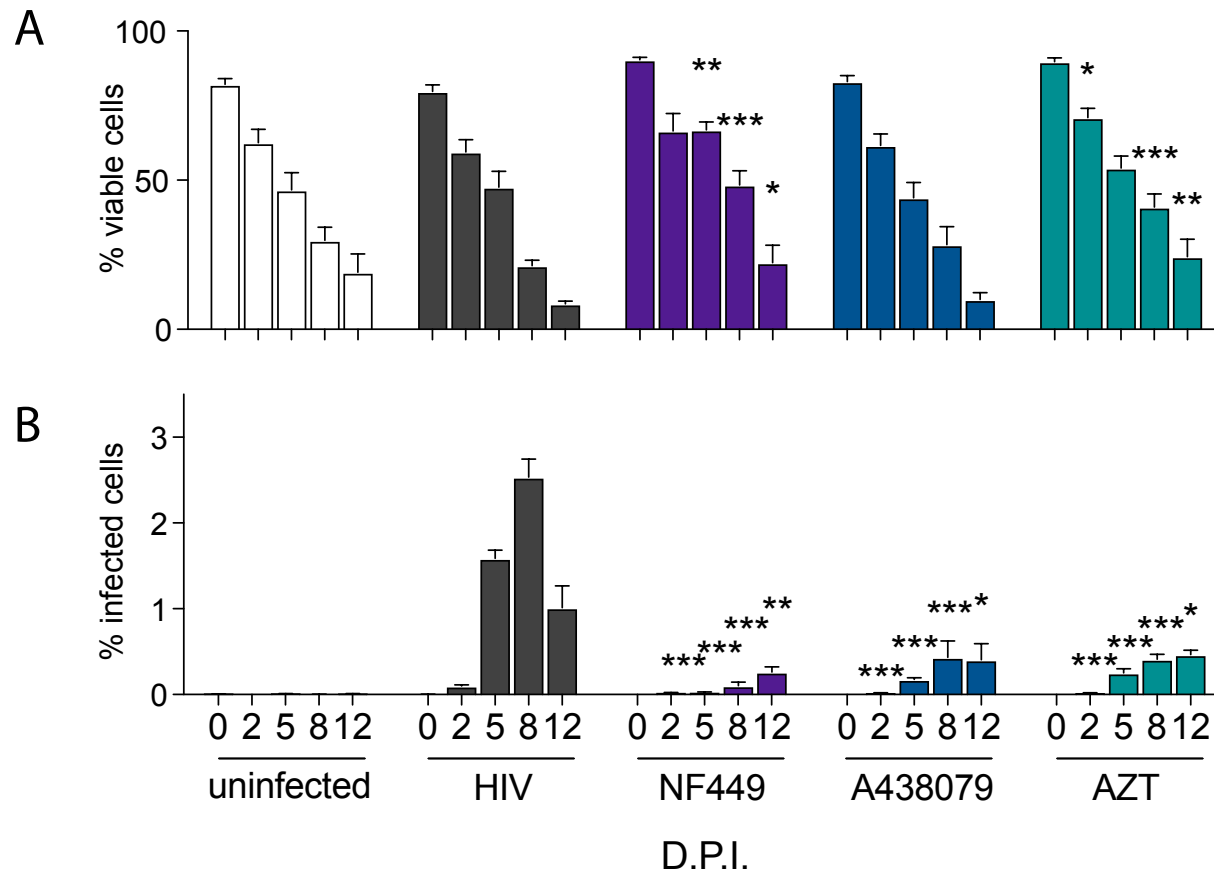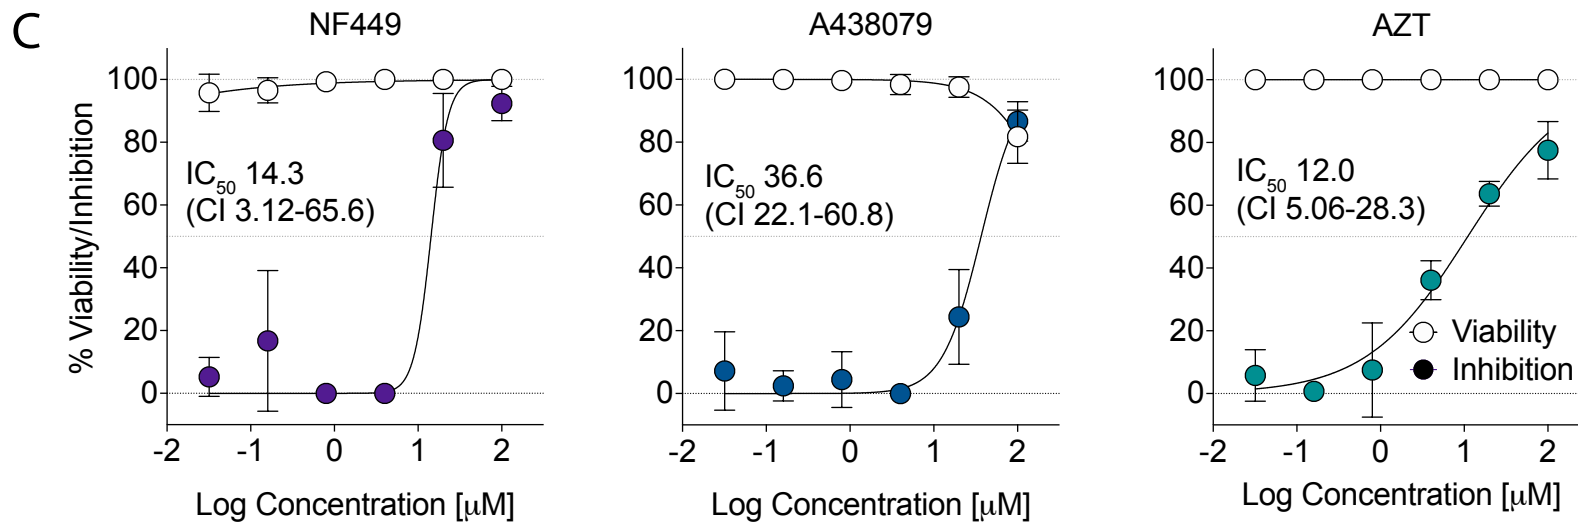

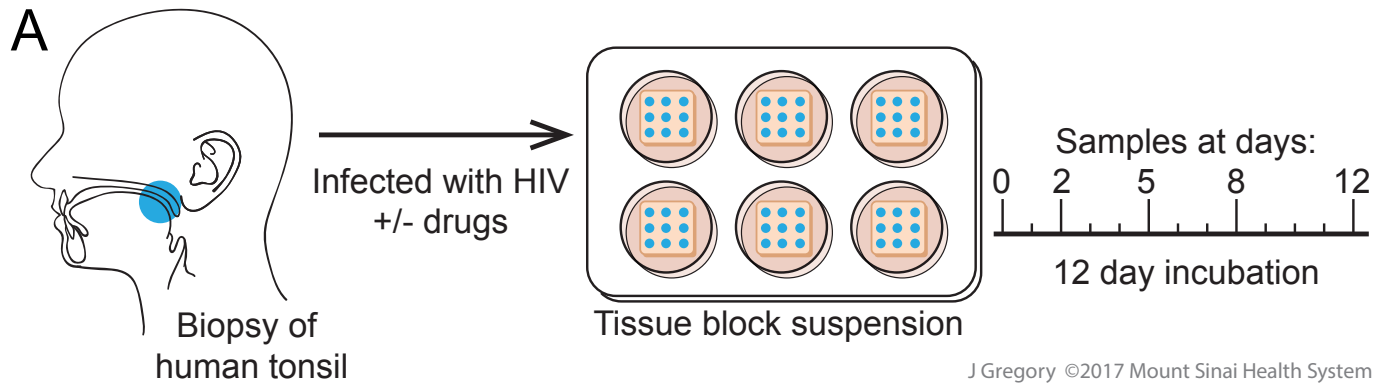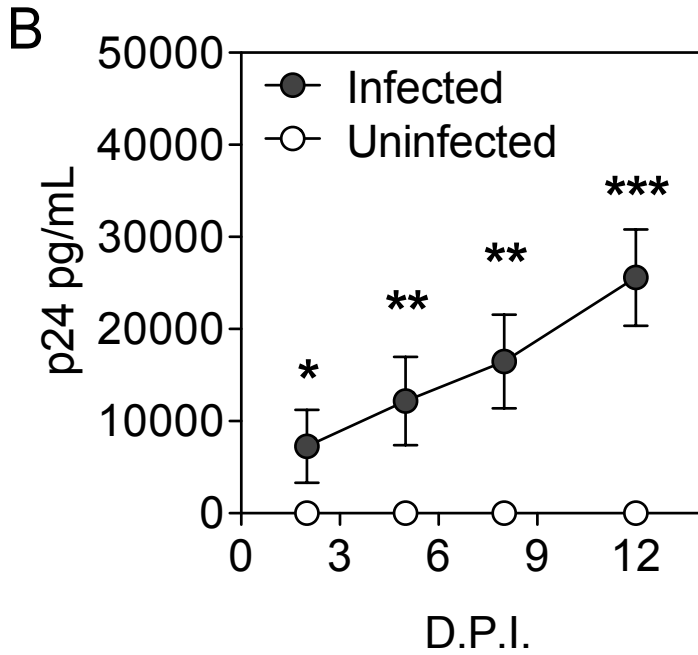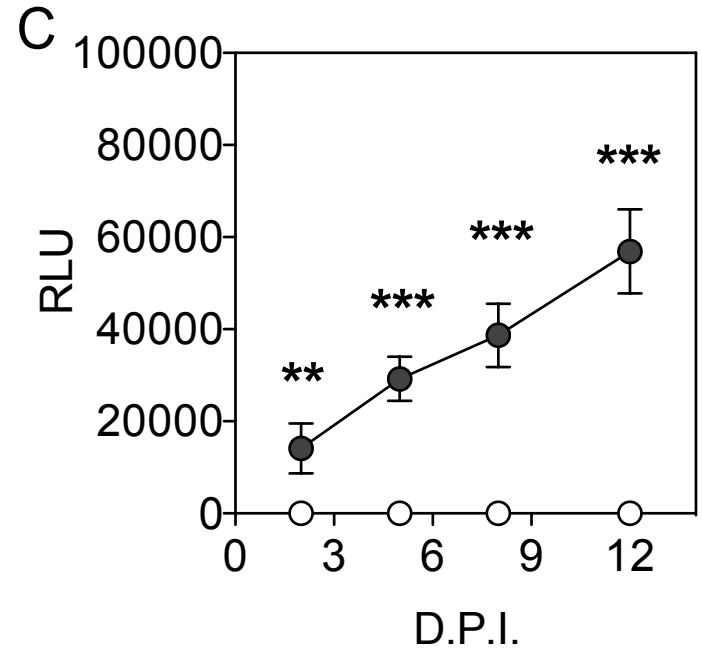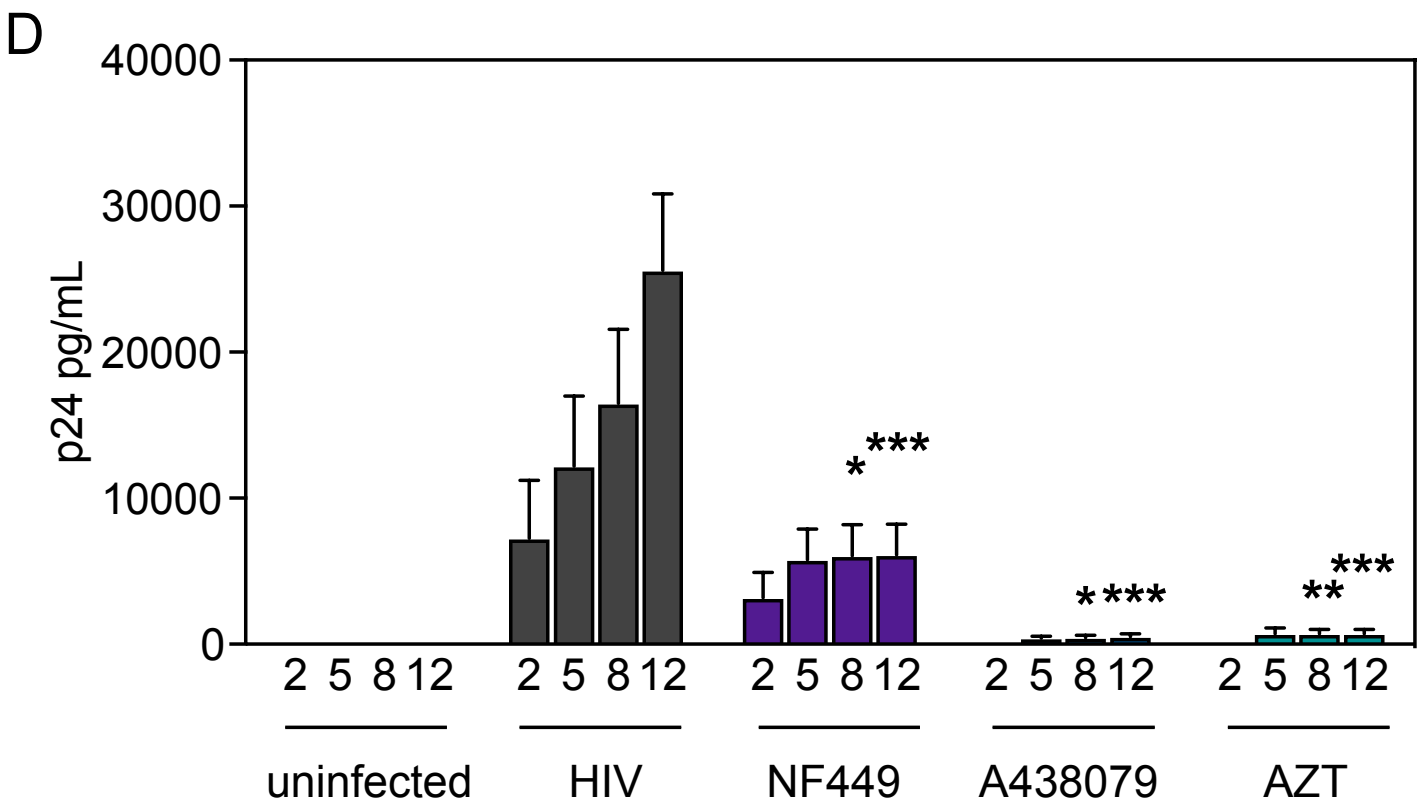

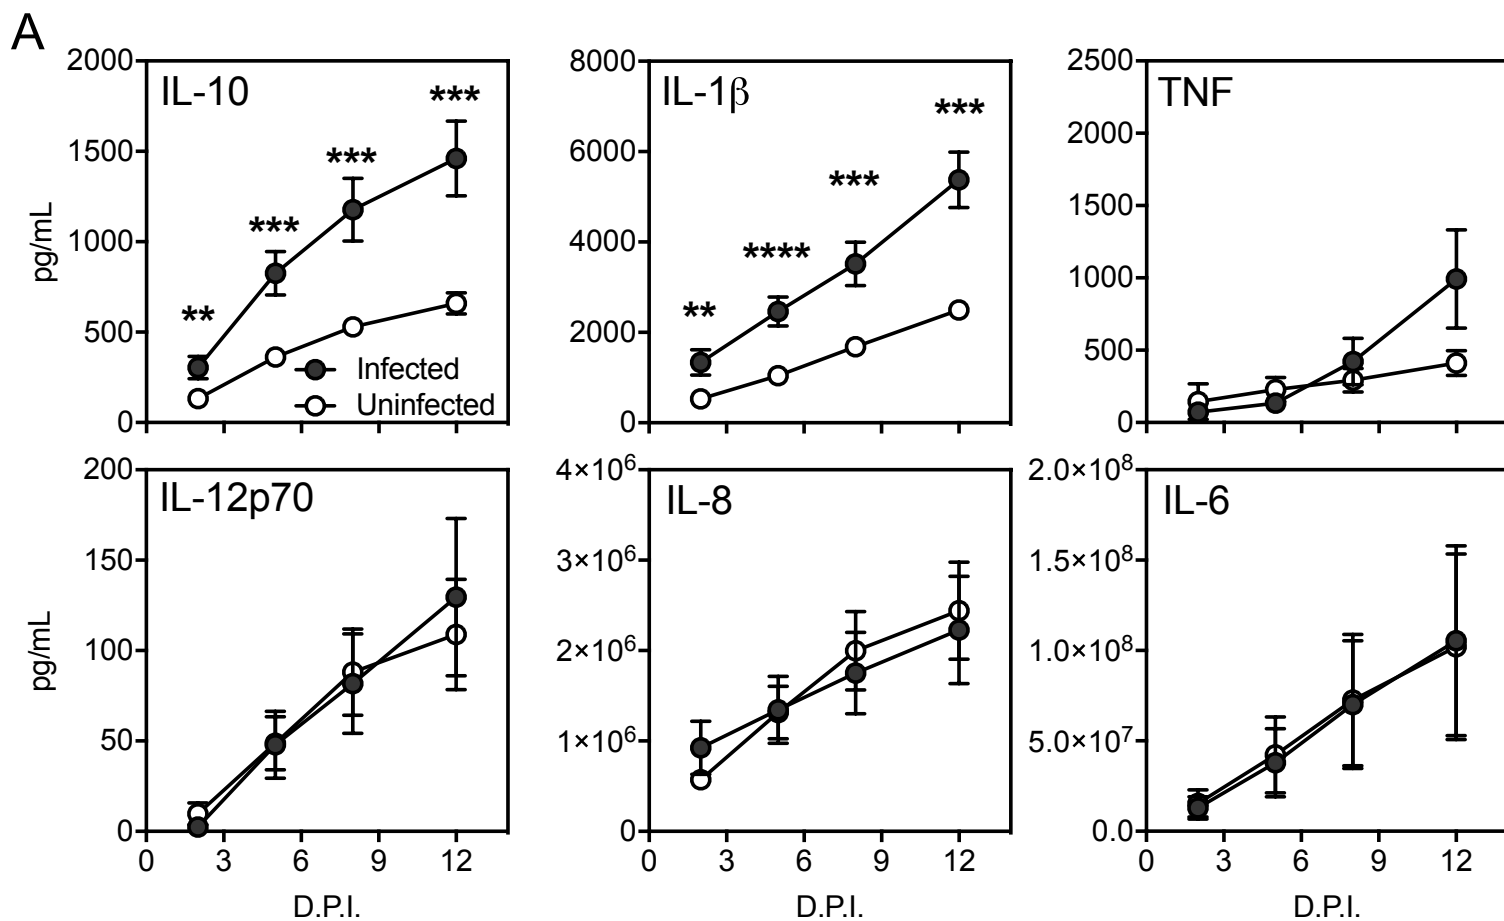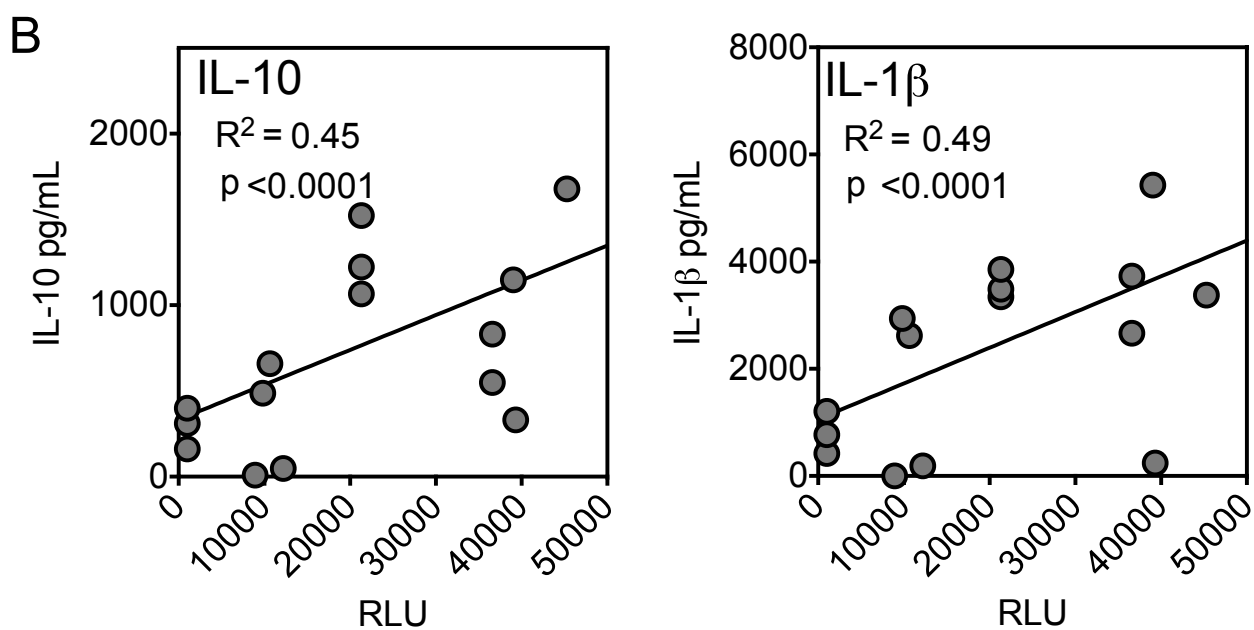



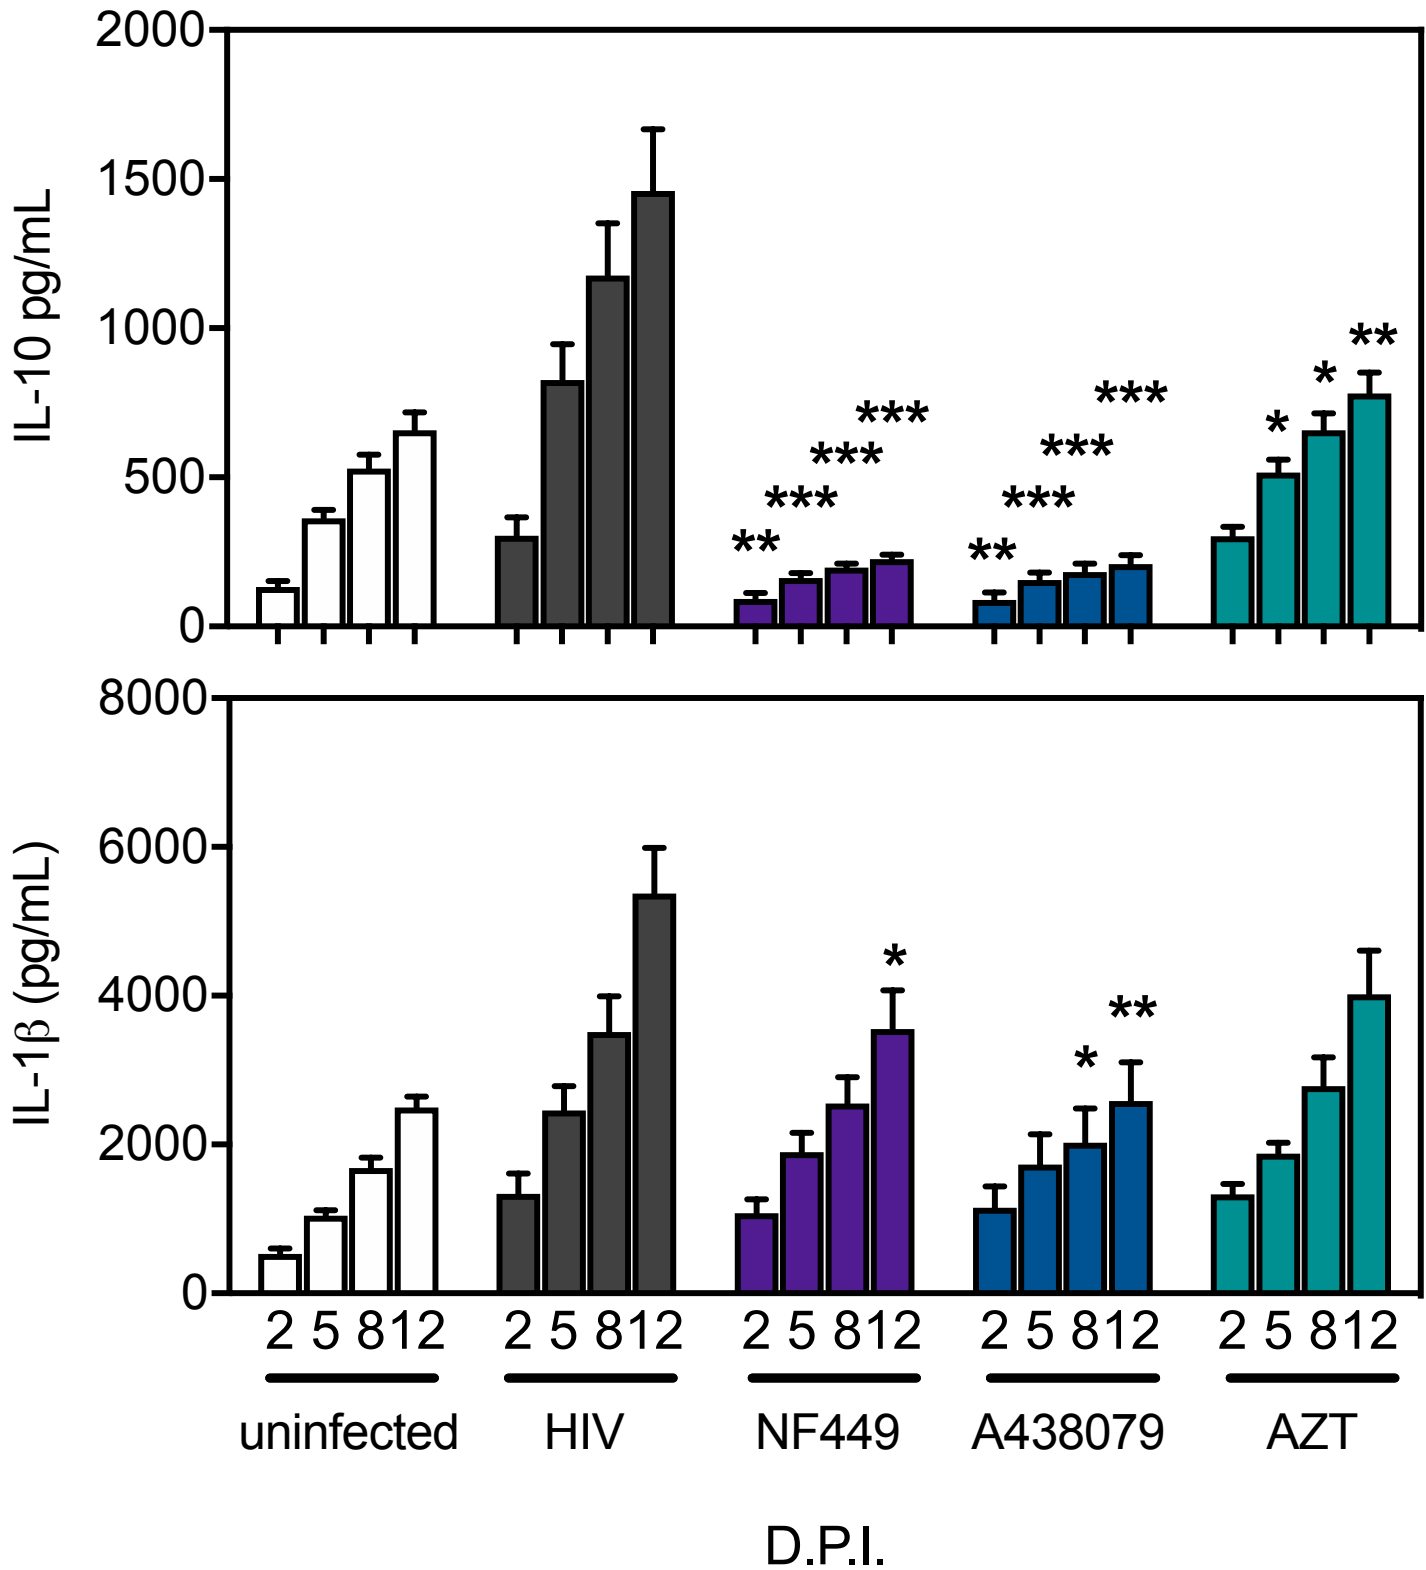

| A                                                                                          |                                                                                              | NF449                                                         | A438079                  | AZT                             |
|--------------------------------------------------------------------------------------------|----------------------------------------------------------------------------------------------|---------------------------------------------------------------|--------------------------|---------------------------------|
| 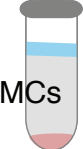<br>PBMCs | HIV infection                                                                                | ↓ ↓                                                           | ↓                        | ↓ ↓ ↓                           |
|                                                                                            | <br>Tonsils | HIV infection (HLAC)<br>HIV infection (p24)<br>IL-10<br>IL-1β | ↓ ↓<br>↓ ↓<br>↓ ↓ ↓<br>↓ | ↓ ↓<br>↓ ↓ ↓<br>↓ ↓ ↓<br>↓<br>— |

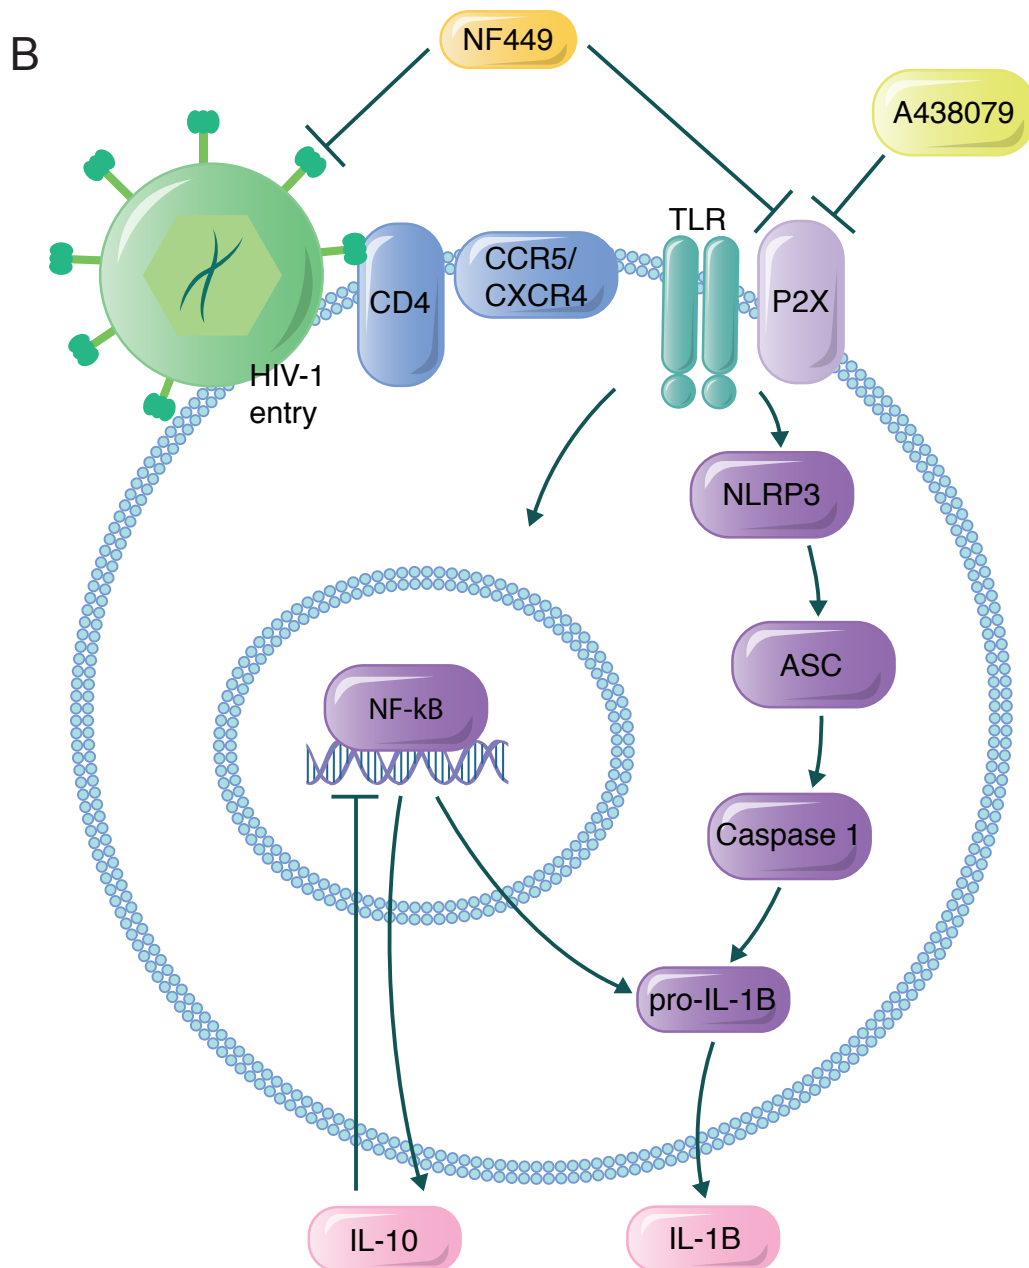

Source: https://www.biorxiv.org/content/10.1101/366179v1.full.pdf
